1 **Maternal high fat diet alters lactation-specific miRNA expression and programs the DNA**  
2 **methylome in the amygdala of female offspring**

3  
4 Sameera Abuaish<sup>1†‡</sup>, Sanoji Wijenayake<sup>1†</sup>, Wilfred C. de Vega<sup>1†</sup>, Christine M.W. Lum<sup>1</sup>, Aya  
5 Sasaki<sup>1</sup>, Patrick O. McGowan<sup>\*1,2,3</sup>

6  
7 †Authors contributed equally to the manuscript.

8  
9 <sup>1</sup>Department of Biological Sciences and Center for Environmental Epigenetics and Development,  
10 Department of Cell and Systems Biology, University of Toronto, Scarborough Campus, 1265  
11 Military Trail, Toronto, Ontario, Canada.

12 <sup>2</sup>Department of Psychology, University of Toronto, Toronto, Ontario, Canada.

13 <sup>3</sup>Department of Physiology, University of Toronto, Toronto, Ontario, Canada.

14

15 Current Address:

16 ‡ Sameera Abuaish, Department of Basic Science, College of Medicine, Princess Nourah bint  
17 Abdulrahman University, PO Box 84428, Riyadh11671, Saudi Arabia. Tel: +966504107345, E-  
18 mail address: [syabuaish@pnu.edu.sa](mailto:syabuaish@pnu.edu.sa)

19

20

21 **Abstract:**

22 Adverse maternal diets high in saturated fats are associated with impaired neurodevelopment and  
23 epigenetic modifications in offspring. Maternal milk, the primary source of early life nutrition in  
24 mammals, contains lactation-specific microRNAs (miRNAs). Lactation-specific miRNAs have  
25 been found in various offspring tissues in early life, including the brain. We examined the effects  
26 of maternal high saturated fat diet (mHFD) on lactation-specific miRNAs that inhibit DNA  
27 methyltransferases (DNMTs), enzymes that catalyze DNA methylation modifications, in the  
28 amygdala of female offspring during early life and adulthood. Offspring exposed to mHFD showed  
29 reduced miR-148/152 and miR-21 transcripts in stomach milk and amygdala in the first week of  
30 life. This was associated with increased DNMT1 expression, DNMT activity, and global DNA  
31 methylation in the amygdala. In addition, persistent DNA methylation modifications from early  
32 life to adulthood were observed in pathways involved in neurodevelopment as well as genes  
33 regulating the DNMT machinery and protein function in mHFD offspring. The findings indicate a  
34 novel link between exogenous, lactation-specific miRNAs and developmental programming of the  
35 neural DNA methylome in offspring.

36

37 **Keywords:**

38 Maternal obesity, high fat diet, epigenetic programming, neurodevelopment, amygdala, female  
39 offspring, milk, lactation-specific microRNA, DNA methylation, DNA methyltransferases,  
40 reduced representation bisulfite sequencing.

41 **Introduction:**

42 Adverse maternal diets high in saturated fats (mHFD) are associated with impaired  
43 neurodevelopment and epigenetic modifications in offspring. Methylation modifications have  
44 been reported both globally (Vucetic et al., 2010) and at select candidate genes in the brain of  
45 offspring exposed to maternal nutrition stress during perinatal life (Grissom et al., 2014; Marco et  
46 al., 2014; Schellong et al., 2019). However, studies to date have largely focused on adult offspring,  
47 long after the period of early developmental exposure. Consequently, the gene regulatory  
48 mechanisms involved in DNA methylation modifications during the period of exposure to a  
49 maternal obesogenic diet and the extent to which these modifications are maintained into  
50 adulthood are unknown.

51 There is recent evidence that the expression of maternal, lactation-specific microRNAs  
52 (miRNAs), which mediate gene silencing via post-transcriptional regulation of target mRNAs, is  
53 significantly altered by a maternal obesogenic diet (Chen et al., 2017). Lactation-specific miRNAs,  
54 encapsulated in stable milk-derived exosomes, appear to cross the offspring's developing intestinal  
55 endothelium post-ingestion (Modepalli et al., 2014; Zemleni et al., 2019; Zhang et al., 2012), and  
56 have been found in various tissues in offspring during early life, including the brain (Baier et al.,  
57 2014; Chen et al., 2016; Izumi et al., 2015; Lässer et al., 2011; Manca et al., 2018). miRNAs  
58 belonging to miR-148/152 family are of particular interest, because they are highly expressed in  
59 maternal milk (Benmoussa and Provost, 2019; Van Herwijnen et al., 2018) and are known  
60 regulators of DNA methyltransferases (DNMTs), enzymes that catalyze DNA methylation  
61 modifications. *In vitro* studies have shown that miRNA-148a and miRNA-152 directly target and  
62 inhibit DNMT1 translation (Long et al., 2014; Pan et al., 2010; Wang et al., 2014; Xu et al., 2013).

63 miRNA-21 is also abundant in maternal milk and indirectly inhibits DNMT1 translation by  
64 targeting Ras guanyl nucleotide-releasing protein-1 (RASGRP1) (Pan et al., 2010).

65 Here, we examined the relationship between lactation-specific miRNAs, the enzymatic  
66 machinery responsible for DNA methylation modifications, and programming of the DNA  
67 methylome in female Long-Evans rat offspring exposed to mHFD. We found that exposure to  
68 mHFD altered levels of lactation-specific miRNA in stomach milk and the brain (amygdala) during  
69 the first week of life. These changes in miRNA levels were inversely associated with DNMT  
70 transcriptional and enzymatic activity. Correspondingly, mHFD offspring showed lower levels of  
71 global DNA methylation and locus-specific DNA methylation modifications, some of which  
72 appear to persist to adulthood.

73

## 74 **Results**

### 75 **Dam and Offspring Body Weight**

76 mHFD dams consuming HFD for 4 weeks were significantly heavier than mCHD dams at  
77 conception ( $t(1,14) = 2.91, p=0.01$ ). During gestation, the caloric intake was significantly higher  
78 among mHFD dams compared to mCHD dams ( $t(1,14) = 3.29, p=0.005$ ). There were no  
79 differences in offspring body weight across the two diet groups at birth ( $p>0.05$ ) and all pups  
80 increased in weight during the pre-weaning period ( $F(1,13)= 953.7, p<0.01$ ). At postnatal day 7  
81 (P7), offspring exposed to mHFD ( $18 \pm 0.72$  g) were heavier relative to mCHD offspring ( $16 \pm$   
82  $0.38$  g; Bonferroni post-hoc  $p=0.006$ ). In data reported previously, body weight and caloric intake  
83 for dams and their offspring sacrificed in adulthood for this study, showed similar effects of mHFD  
84 during the pre-weaning period (Sasaki et al., 2013). At P90, offspring showed comparable body  
85 weights among the two diet groups ( $p>0.05$ ).

## 86 **Expression of maternal milk-derived miRNAs in stomach milk and amygdala**

87 At P7, miR-152-5P ( $t(1,6)=6.393$ ,  $p=0.001$ ) and miR-21-5P ( $t(1,6)=4.15$ ,  $p=0.006$ ) showed  
88 lower transcript abundance in the stomach milk of female neonates exposed to mHFD, whereas  
89 expression levels of miR-148-5P ( $t(1,6)=-0.056$ ,  $p=0.957$ ), miR-148-3P ( $t(1,6)=-1.751$ ,  $p=0.131$ ),  
90 and miR-152-3P ( $t(1,6)=-0.042$ ,  $p=0.968$ ) remained unchanged (Fig.1A). For the same five  
91 miRNAs measured in the female amygdala, miR-148-3P ( $t(1,12)=2.293$ ,  $p=0.041$ ) and miR-152-  
92 3P ( $t(1,12)=2.254$ ,  $p=0.048$ ) decreased in transcript abundance in response to mHFD when  
93 compared to mCHD (Fig. 1B). miR-148-5P ( $t(1,12)=0.911$ ,  $p=0.380$ ) and miR-152-5P  
94 ( $t(1,12)=0.049$ ,  $p=0.962$ ) remained unchanged and miR-21-5P was not detected in the amygdala  
95 of female offspring at P7.

## 96 **mRNA expression of epigenetic regulators**

97 We examined the mRNA transcript abundance of epigenetic regulators involved in DNA  
98 methylation modifications, including DNMT1, DNMT3a, DNMT3b, direct post-transcriptional  
99 targets of lactation-specific miR-148/152 and miR-21, as well as MeCP2 and GADD45 $\alpha$  in the  
100 amygdala of female offspring exposed to mCHD and mHFD at P7 and P90. DNMT1 ( $t(1,10)=-$   
101  $2.346$ ,  $p=0.041$ ) and MeCP2 ( $t(1,10)=-2.237$ ,  $p=0.049$ ) transcript abundance significantly  
102 increased in response to mHFD at P7 (Fig. 2A). Transcript abundance of DNMT3a ( $t(1,12)=-$   
103  $0.942$ ,  $p=0.365$ ), DNMT3b ( $t(1,12)=-0.712$ ,  $p=0.490$ ), and GADD45 $\alpha$  ( $t(1,12)=-0.871$ ,  $p=0.401$ )  
104 remained unchanged. At P90, transcript abundance of DNMT1 ( $t(1,8)=-1.20$ ,  $p=0.265$ ), DNMT3a  
105 ( $t(1,8)=1.482$ ,  $p=0.177$ ), DNMT3b ( $t(1,8)=0.623$ ,  $p=0.551$ ), MeCP2 ( $t(1,8)=0.724$ ,  $p=0.490$ ), and  
106 GADD45 $\alpha$  ( $t(1,8)=1.186$ ,  $p=0.270$ ), remained unchanged (Fig. 2B).

107

108

109

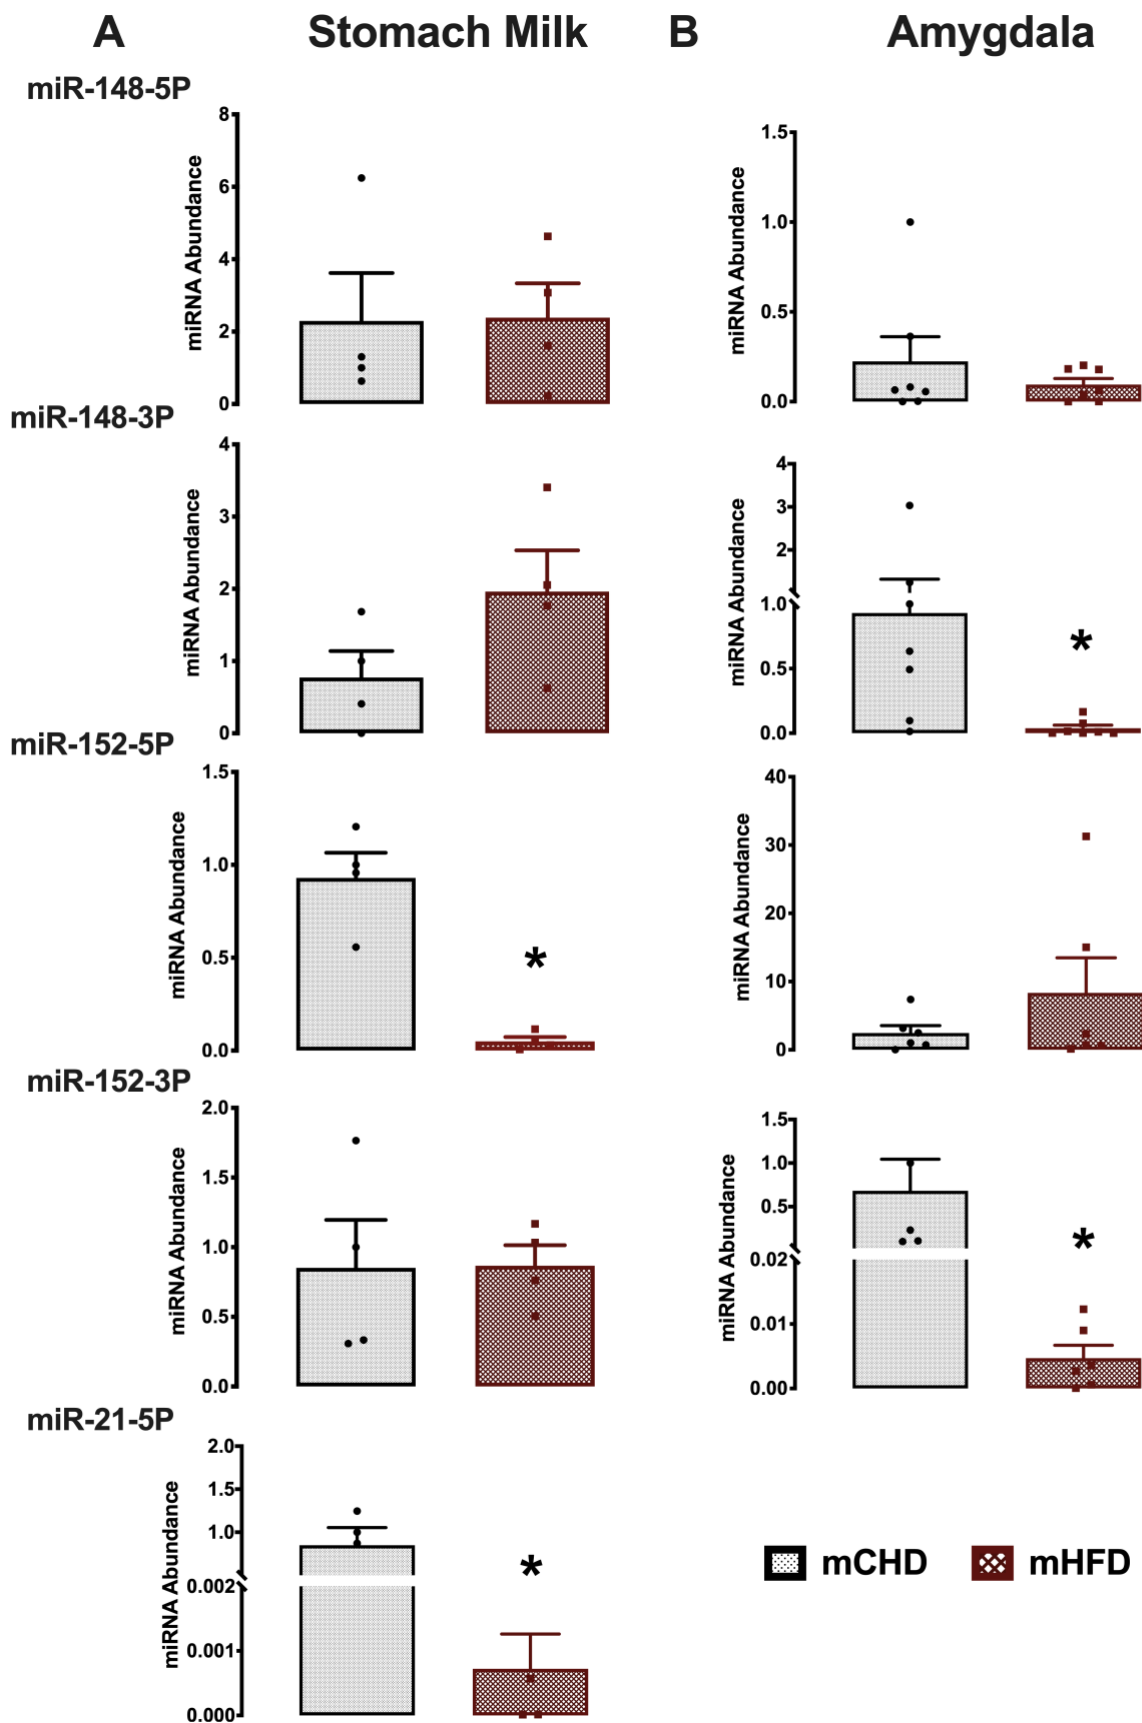

111

112 **Fig 1. Relative abundance of five lactation-specific miRNAs with maternal HFD exposure**

113 **(mHFD) compared to chow diet control (mCHD).** (A) Stomach milk and (B) amygdala of

114 female offspring at P7. Data are mean  $\pm$  SEM with n = 4 and n=6 independent biological replicates

115 per experimental group in stomach milk and amygdala, respectively. \* Significantly different from

116 mCHD ( $p < 0.05$ ; two-tailed student t-test).

117

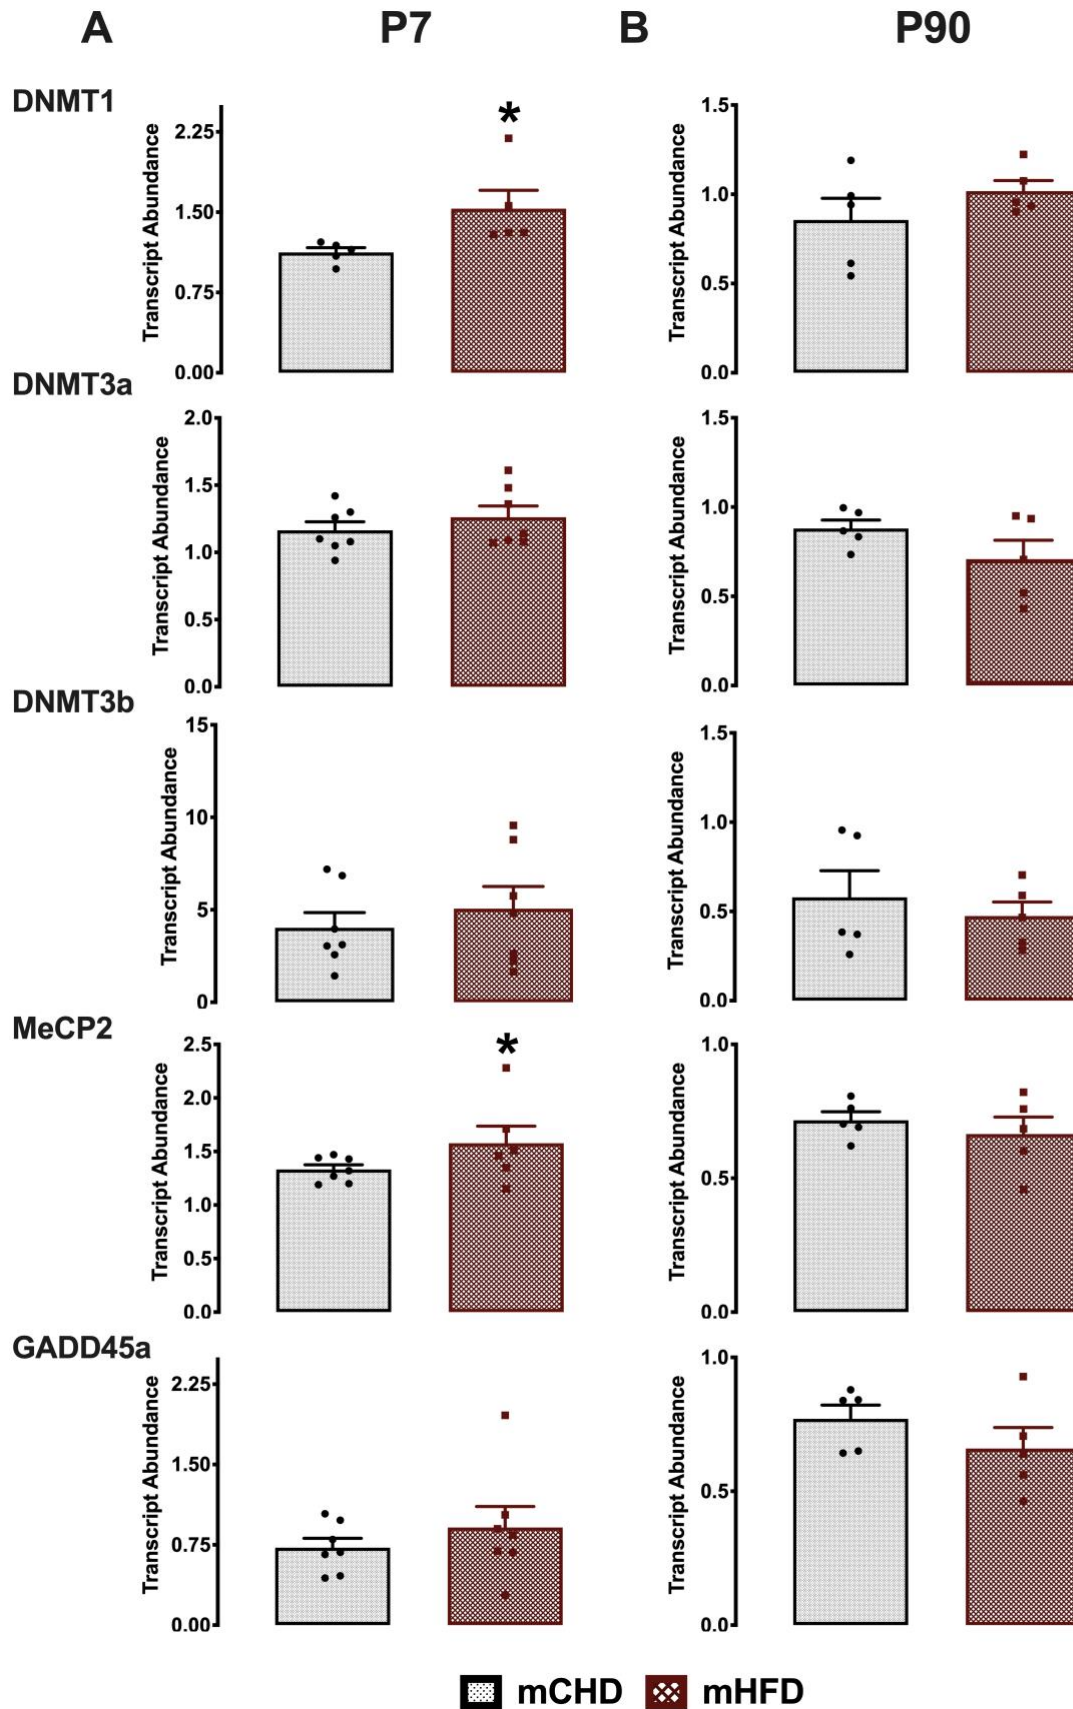



119

120 **Fig 2. Effect of maternal HFD exposure on relative transcript abundance of DNA**  
121 **methyltransferases and DNA binding proteins in the amygdala of female offspring.**

122 (A) P7 and (B) P90. mCHD is control chow diet and mHFD is maternal high-fat diet exposure.

123 Data are mean  $\pm$  SEM with n = 6 independent biological replicates per experimental group. \*

124 Significantly different from mCHD ( $p < 0.05$ ; two-tailed student t-test).

125

## 126 **DNMT Enzymatic Activity and Global DNA Methylation**

127 We next examined whether changes in transcript abundance of DNMTs was associated  
128 with changes in their enzymatic activity and global LINE-1 5-methylcytosine (5mC) levels. In P7  
129 offspring, DNMT enzymatic activity robustly increased in response to mHFD ( $t(1,5)=-5.95$ ,  
130  $p=0.02$ ; Fig. 3A). Correspondingly, global LINE-1 5mC (%) increased in response to mHFD when  
131 compared to mCHD ( $t(1,6)=-2.98$ ,  $p=0.03$ ; Fig. 3B). A strong linear correlation was observed  
132 between increased DNMT enzymatic activity (OD/h/mg) and increased global LINE-1 5mC (%)  
133 levels at P7 ( $R_2 = 0.896$ ,  $p= 0.001$ ; Fig. 3C).

134 At P90, female mHFD offspring had a trend of lower DNMT enzymatic activity compared  
135 to mCHD ( $t(1,6)= 1.794$ ,  $p = 0.06$ ; Fig. 4A). Global LINE-1 5mC (%) levels significantly  
136 decreased in response to mHFD ( $t(1,6)=3.805$ ,  $p=0.009$ ; Fig. 4B). However, global LINE-1 5mC  
137 (%) was not associated with total DNMT enzymatic activity at P90 ( $R_2 = 0.07$ ,  $p= 0.538$ ; Fig. 4C).

## 138 **Genome-wide DNA Methylation Analysis**

139 Genome-wide DNA methylation at single nucleotide resolution was assessed using  
140 reduced representation bisulfite sequencing (RRBS). At P7 and P90, female offspring showed 777  
141 and 1050 significant differentially methylated regions (DMRs), respectively. At P7, 69% of DMRs  
142 were hypomethylated and 31% were hypermethylated, and at P90 61% of DMRs were  
143 hypomethylated and 39% were hypermethylated (Fig. 5A). At P7, approximately 50% of DMRs  
144 were found in intergenic regions, while 21 % and 29 % were found in promoters and gene bodies,  
145 respectively. At P90, 56% of DMRs were found in intergenic regions, while only 6% were found  
146 in promoters and 38% were found in gene bodies.

147 Fifty-seven DMRs were shared across the two age groups (Fig. 5B) corresponding to 26  
148 genes (Table 1). Fifteen of these genes were consistently hypomethylated at both P7 and P90

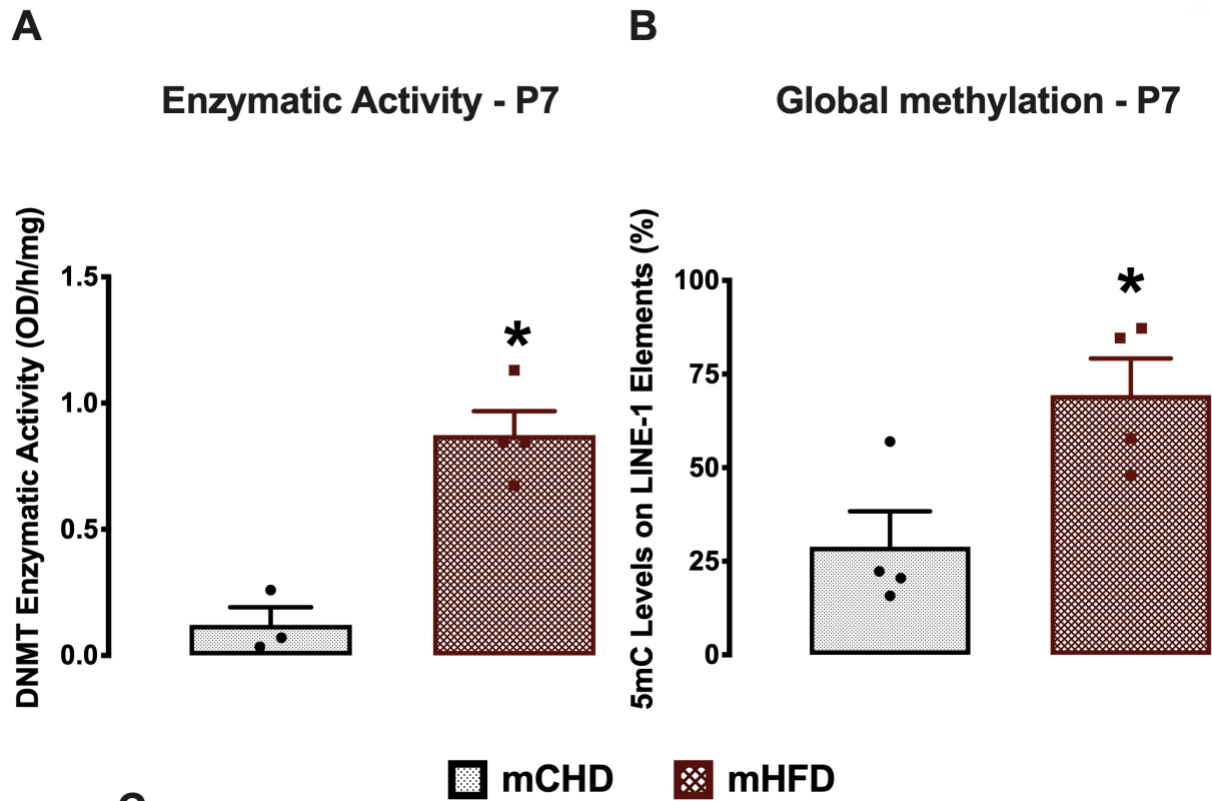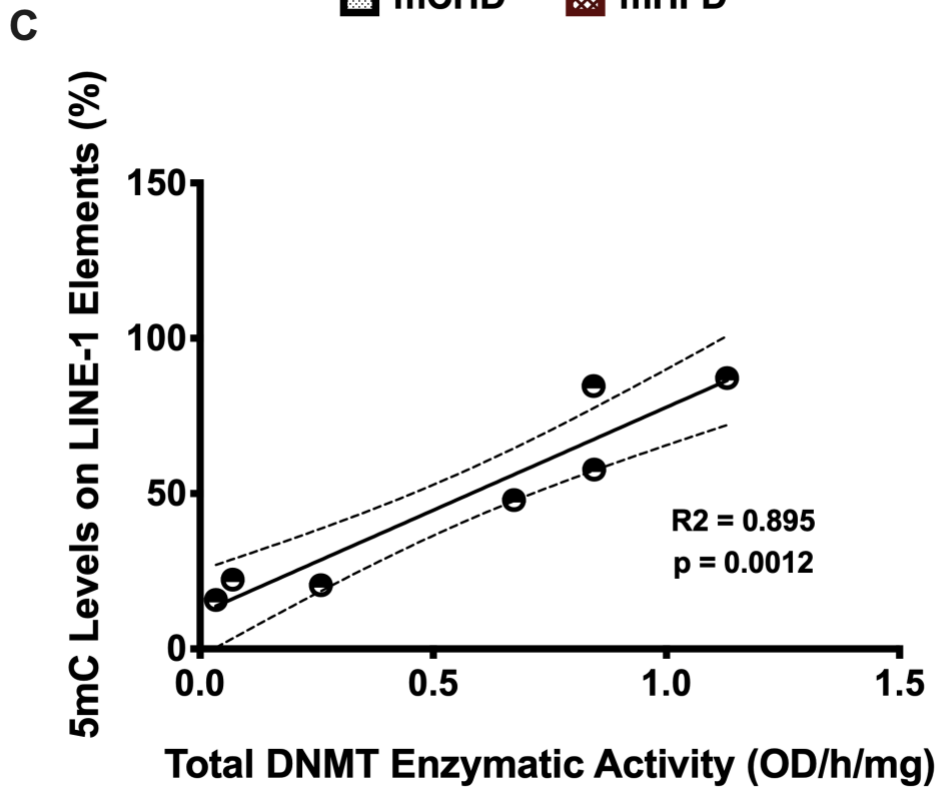

151 **Fig 3. Global DNA methylation in the amygdala of neonatal offspring.** A) Total DNA  
152 methyltransferase activity (OD/h/mg). B) LINE-1 global 5mC levels (%). C) Pearson correlation  
153 between total DNMT enzymatic activity (OD/h/mg) and global 5mC (%) levels ( $p < 0.05$ ). mCHD  
154 is control house chow and mHFD is maternal high-fat diet exposure. Data are mean  $\pm$  SEM with  
155  $n = 3-4$  independent biological replicates per experimental group. \* Significantly different from  
156 mCHD ( $p < 0.05$ ; two-tailed student t-test).

157

158

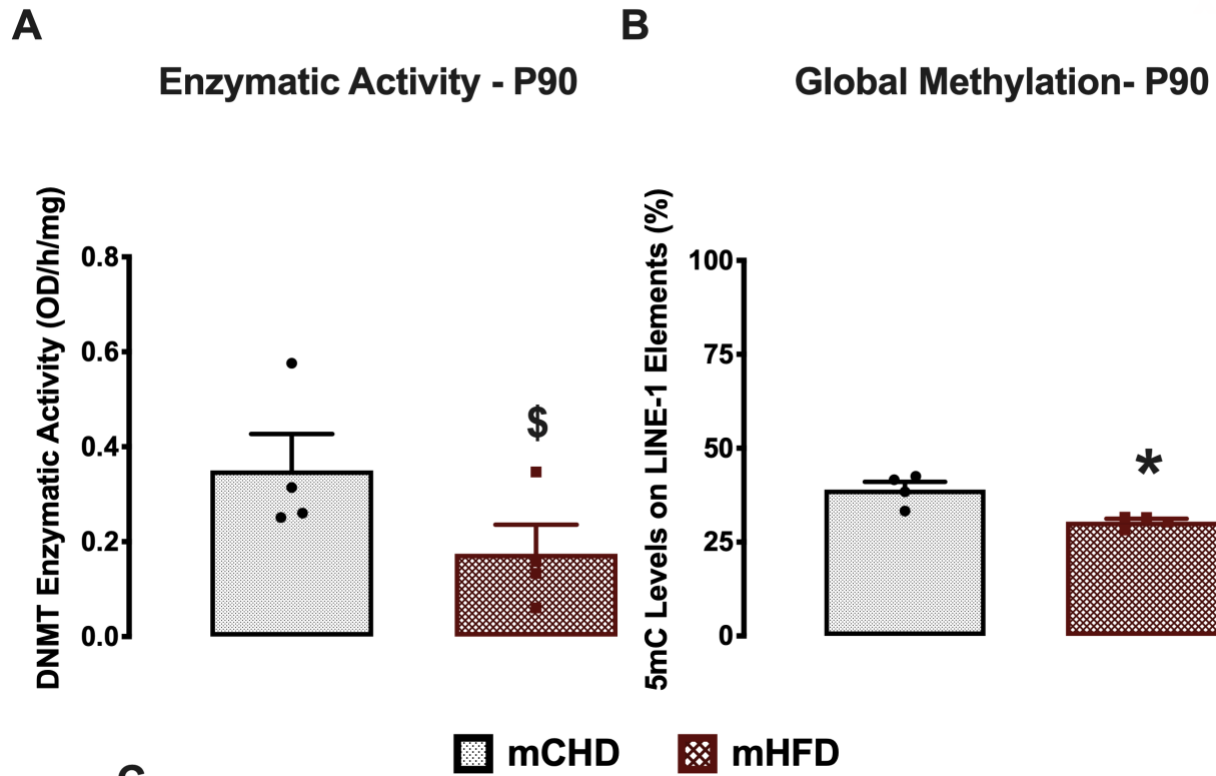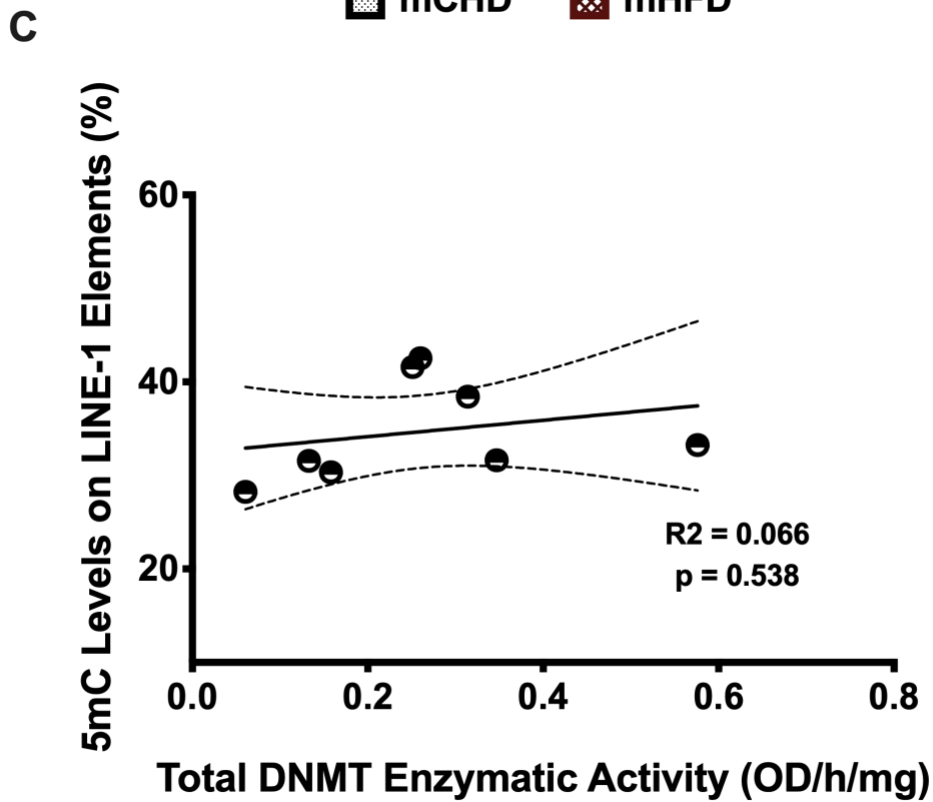

159  
160  
161

162 **Fig 4. Global DNA methylation in the amygdala of adult offspring.** A) Total DNA  
163 methyltransferase activity (measured as OD/h/mg). B) LINE-1 global 5mC levels (%). C)  
164 Pearson linear correlation between total DNMT activity (OD/h/mg) and global 5mC (%) levels  
165 ( $p < 0.05$ ). mCHD is control house chow and mHFD is maternal high-fat diet exposure. Data are  
166 mean  $\pm$  SEM with  $n = 4$  independent biological replicates per experimental group. \*  
167 Significantly different from mCHD ( $p < 0.05$ ). \$ Trending towards significance ( $p = 0.06$ ).

168

169

170

171

172

173

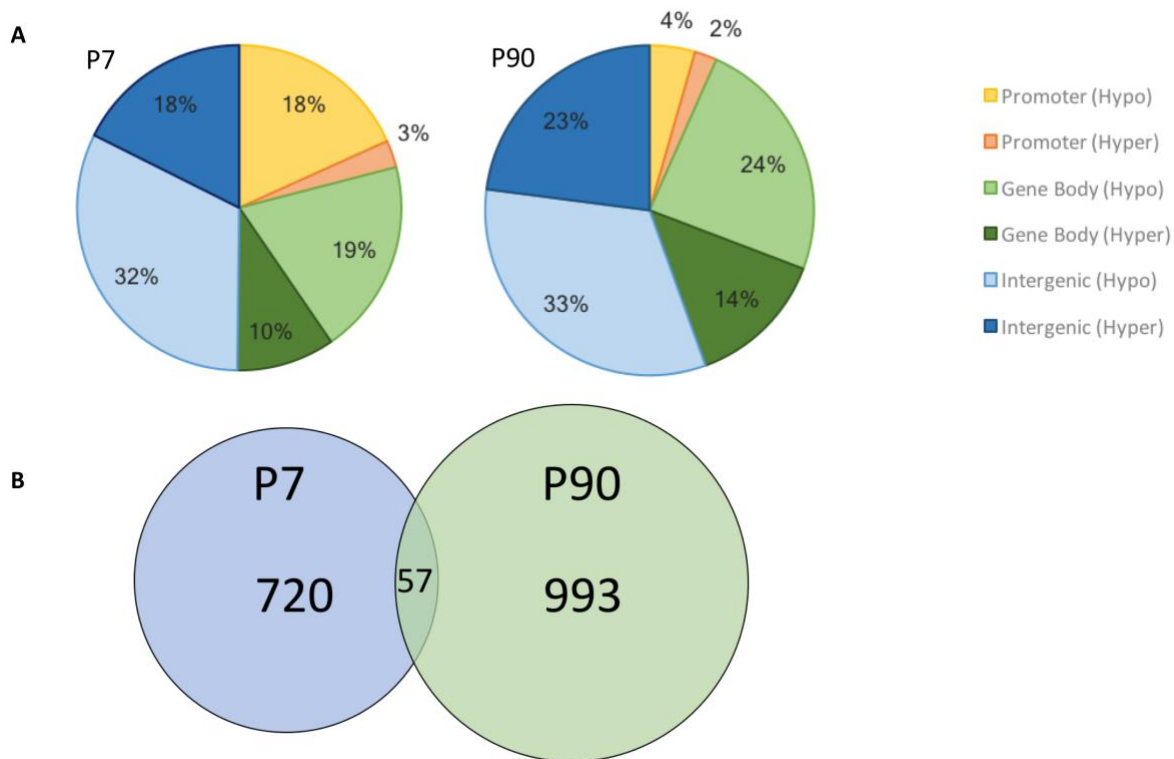

174  
175

176 **Fig 5. Significant differentially methylated regions (DMRs) in the amygdala of female**  
177 **offspring exposed to maternal HFD at P7 and P90.** A) Distribution of hyper- and  
178 hypomethylated DMRs in HFD offspring in terms of genic location including promoter regions,  
179 gene body, and intergenic regions. B) Venn diagram illustrating the number of DMRs that are  
180 unique to female offspring at P7 (blue) and P90 (green) in response to maternal HFD exposure in  
181 the amygdala. The area in between represents the numbers of overlapping DMRs across the two  
182 ages.

183

184 (LOC310926, Tbc1d10b, Paqr6, Rgs3, Unc79, Icam4, Gtf2e1, Hic2, Tpst2, Rab5a, Nfatc1, Nhs,  
185 Lancl3, Mecp2, Ndufb1), while five genes remained hypermethylated at the two ages  
186 (LOC499742, Anxa6, Plvap, Rsu1, Zfp423). Seven DMRs that were hypomethylated and 12  
187 DMRs that were hypermethylated in response to mHFD at P7 (33% of the overlapping DMRs)  
188 showed opposite methylation differences at P90. The 6 genes associated with these DMRs showed  
189 opposite methylation patterns in early life compared to adulthood. Three genes were  
190 hypomethylated at P7 and hypermethylated at P90 (Polr3g, Prpf38b, and Htatsf1) and another 3  
191 genes were hypermethylated at P7 and hypomethylated at P90 (Ank1, Dupd1, and Tmprss9). A  
192 total of 372 and 444 genes were found to be differentially methylated at P7 and P90, respectively  
193 (Supplementary Table 2-3).

#### 194 **Gene Annotation Enrichment Analysis**

195 gProfiler was used to conduct Gene Ontology (GO) analysis to identify enriched biological  
196 processes associated with the differentially methylated genes. Thirty-four significantly enriched  
197 overlapping GO terms were shared across early life and adulthood, clustered into 5 functionally  
198 related groups (Fig. 6; Supplementary Table 4). P7 and P90 animals shared GO terms associated  
199 with cellular morphogenesis and organism development (10 GO terms) as well as neuronal  
200 projection and nervous system development (11 terms). In addition, terms associated with protein  
201 phosphorylation (5 GO terms) and protein transportation and secretion (8 GO terms) were shared  
202 across P7 and P90. The lipid response GO term was uniquely shared across both age groups and  
203 did not cluster with other GO terms.

204 At P7, a total of 372 DMRs were associated with annotated genes. gProfiler identified 163  
205 significantly enriched biological processes that clustered into 10 functionally related groups (Fig.  
206 7; Supplementary Table 5). Three groups were involved in systems development, consisting of  
207 processes related to organismal (8 GO terms), cellular (19 GO terms), and neuronal (27 GO terms)



208 **Table 1.** Genes containing significant DMRs sorted by chromosomes, percentage of differential  
 209 methylation between mCHD and mHFD, and the location of the DMR in the amygdala of female  
 210 offspring at P7 and P90.

211

| Chromosome | Gene Symbol | Gene Name                                                         | P7 Methylation differences (%) | P90 Methylation differences (%) | Gene Location |
|------------|-------------|-------------------------------------------------------------------|--------------------------------|---------------------------------|---------------|
| chr1       | LOC310926   | Hypothetical protein LOC310926                                    | -21.01                         | -10.295                         | Gene body     |
| chr1       | Tbc1d10b    | TBC1 domain family, member 10b                                    | -11.427                        | -30.145                         | Promoter      |
| chr2       | Paqr6       | Progesterin and adipoQ receptor family member 6                   | -40.93                         | -11.022                         | Gene body     |
| chr2       | Polr3g      | RNA polymerase III subunit G                                      | -19.942                        | 5.273                           | Gene body     |
| chr2       | Prpf38b     | Pre-mRNA processing factor 38B                                    | -8.727                         | 5.153                           | Gene body     |
| chr3       | LOC499742   | LRRG00137                                                         | 27                             | 34.943                          | Gene body     |
| chr5       | Rgs3        | Regulator of G-protein signaling 3                                | -8.432                         | -7.377                          | Gene body     |
| chr6       | Unc79       | Unc-79 homolog                                                    | -17.035                        | -13.765                         | Gene body     |
| chr7       | Tmprss9     | Transmembrane protease, serine 9                                  | 12.28                          | -10.145                         | Gene body     |
| chr8       | Icam4       | Intercellular adhesion molecule 4, Landsteiner-Wiener blood group | -12.475                        | -15.715                         | Promoter      |
| chr10      | Anxa6       | Annexin A6                                                        | 20.15                          | 34.822                          | Gene body     |

|       |         |                                                                    |         |         |           |
|-------|---------|--------------------------------------------------------------------|---------|---------|-----------|
| chr11 | Gtf2e1  | General transcription factor IIE subunit 1                         | -10.285 | -6.048  | Gene body |
| chr11 | Hic2    | HIC ZBTB transcriptional repressor 2                               | -7.472  | -5.325  | Gene body |
| chr12 | Tpst2   | Tyrosylprotein sulfotransferase 2                                  | -8.54   | -15.268 | Gene body |
| chr14 | Rab5a   | Ras-related protein Rab-5A                                         | -7.45   | -7.975  | Promoter  |
| chr15 | Dupd1   | Dual specificity phosphatase and pro isomerase domain containing 1 | 11.21   | -8.108  | Gene body |
| chr16 | Ank1    | Ankyrin 1                                                          | 5.695   | -30.753 | Gene body |
| chr16 | Plvap   | Plasmalemma vesicle associated protein                             | 7.403   | 5.117   | Promoter  |
| chr17 | Rsu1    | Ras suppressor protein 1                                           | 5.56    | 7.537   | Gene body |
| chr18 | Nfatc1  | Nuclear factor of activated T-cells 1                              | -9      | -17.6   | Gene body |
| chr19 | Zfp423  | Zinc finger protein 423                                            | 9.005   | 8.777   | Gene body |
| chrX  | Nhs     | NHS actin remodeling regulator                                     | -5.795  | -18.252 | Gene body |
| chrX  | Lancl3  | LanC like 3                                                        | -14.728 | -11.385 | Promoter  |
| chrX  | Mecp2   | Methyl CpG binding protein 2                                       | -5.84   | -5.72   | Promoter  |
| chrX  | Htatsf1 | HIV-1 Tat specific factor 1                                        | -5.308  | 14.31   | Promoter  |

---

|      |             |                                                 |        |        |          |
|------|-------------|-------------------------------------------------|--------|--------|----------|
| chrX | Ndufb1<br>1 | NADH:ubiquinone<br>oxidoreductase<br>subunit B1 | -5.608 | -17.19 | Promoter |
|------|-------------|-------------------------------------------------|--------|--------|----------|

---

212

213 development. Two other groups were involved in post-translational modifications, including  
214 protein phosphorylation (13 GO terms) and catabolic process (29 GO terms). GO terms involved  
215 in cellular responses to stimuli (13 GO terms), including growth factors, stress, and organic  
216 compounds, as well as GO terms involving cell secretion and signal transduction (23 GO terms),  
217 metabolic regulation (11 GO terms), apoptosis (7 GO terms), and gene expression (13 GO terms)  
218 were also enriched in early life (FDRs<0.05).

219 At P90, a total of 444 DMRs were associated with annotated genes, where 105 GO terms  
220 were clustered into 7 functionally related groups (Fig. 8; Supplementary Table 6). Three groups  
221 were involved in systems development, including organismal (12 GO terms), cellular (14 GO  
222 terms), and neuronal (19 GO terms) development. Twenty-four GO terms were clustered into  
223 protein phosphorylation and signaling pathways, which included GTPase activity, regulation, and  
224 intracellular signal transduction. Twenty-one GO terms were clustered into protein localization  
225 and secretion and 10 GO terms were clustered into ion transport. Terms involved in cellular  
226 stimulus response (5 GO terms) and the response to lipopolysaccharide and lipids were also  
227 enriched in adulthood (FDRs<0.05). DAVID analysis generated a similar list of enriched GO terms  
228 that were shared across early life and adulthood as well as GO terms that are unique to each age  
229 (Supplementary Fig. 1-3).

230 Gene enrichment analysis was conducted using the Kyoto Encyclopedia of Genes and  
231 Genomes (KEGG) database of pathways representing both empirical and predicted molecular  
232 interactions, to examine networks that include cellular processes, organismal systems,  
233 environmental information processing, and metabolism. Eight KEGG pathways were shared  
234 across P7 and P90 age groups, including MAPK, cGMP-PKG, cAMP, and calcium signaling  
235 pathways (FDR<0.05; Table 2). These signaling pathways are involved in axon guidance, which

236 was also enriched with a large number of differentially methylated genes. In addition, the oxytocin-  
237 signaling pathway, tight junction, and circadian entrainment KEGG pathways were significantly  
238 enriched from early life to adulthood.

239 Ten KEGG pathways were unique to early life (FDR<0.05; Supplementary Table 7),  
240 including the Wnt signaling pathway, neurotrophin signaling pathway, MAPK signaling, axonal  
241 guidance, and long-term potentiation. In addition, two endocrine system pathways including  
242 thyroid hormone and GnRH signaling were enriched with genes differentially methylated at P7.  
243 KEGG pathways associated with human diseases affecting the nervous system, including  
244 Alzheimer's disease and amphetamine addiction, and nervous system related signaling pathways  
245 involved in retrograde endocannabinoid signaling were also identified.

246 Twenty KEGG pathways were unique to adulthood (FDR<0.05; Supplementary Table 8).  
247 A set of three interrelated signaling pathways were enriched at P90, including the Ras, Rap1, and  
248 PI3K-Akt signaling pathways. Three nervous system-specific pathways were enriched including,  
249 GABAergic synapse, glutamatergic synapse, and long-term depression. The analysis revealed  
250 three endocrine-related pathways, including insulin secretion, relaxin signaling, and aldosterone  
251 synthesis and secretion. Two pathways important for cellular integrity, extracellular matrix  
252 (ECM)-receptor interaction and focal adhesion, were also identified. A number of cardiovascular  
253 pathways relating to cardiomyopathy and vascular smooth muscle contraction as well as pathways  
254 involved in cancer development and transcriptional dysregulation were enriched at P90.

255

256

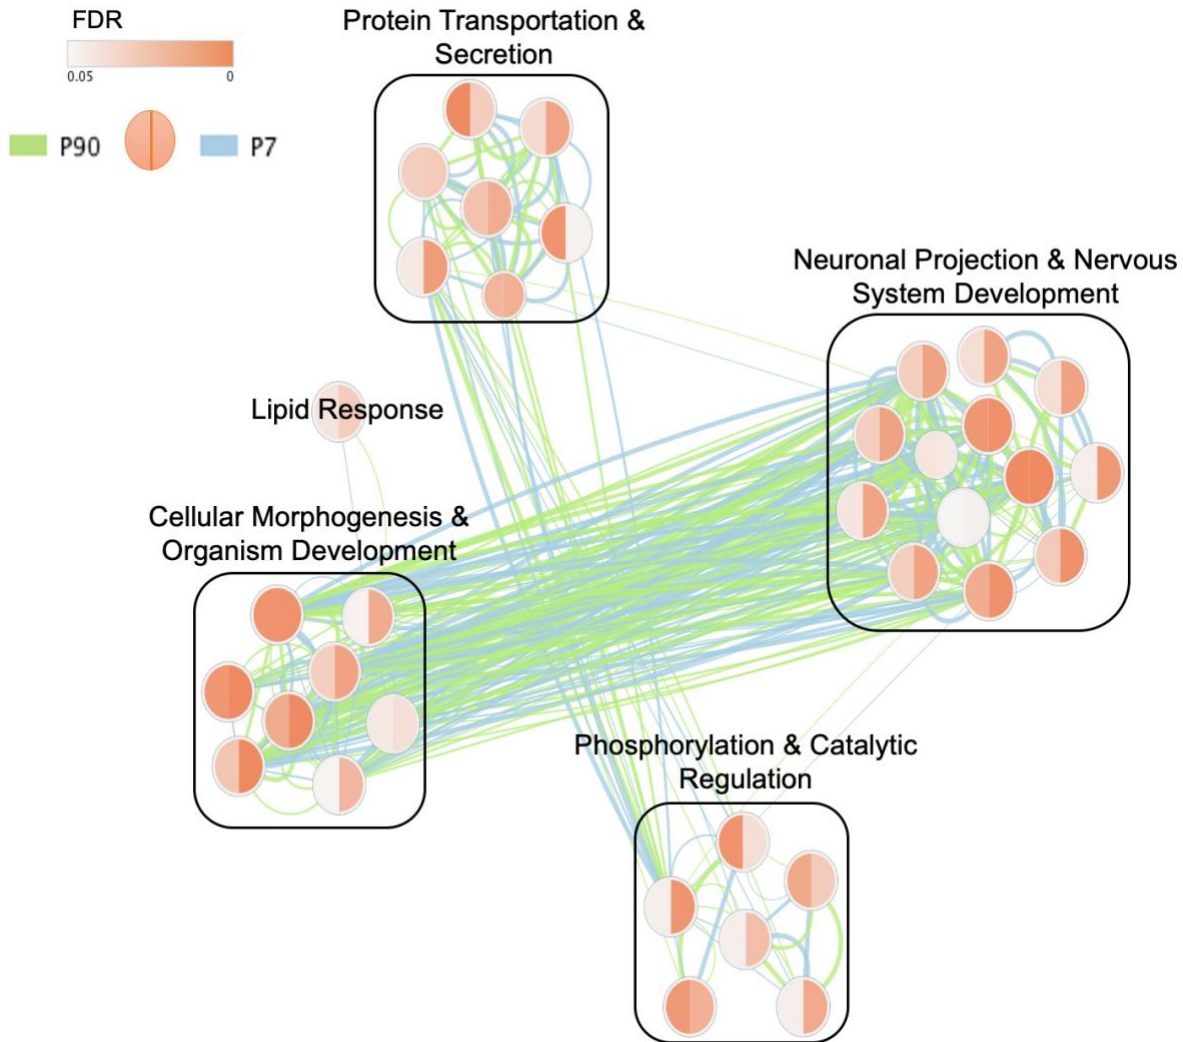

257  
258

259 **Fig 6. Overlapping clusters of Gene Ontology (GO) Biological Processes enriched in P7 (right**  
260 **half of nodes and blue edges) and P90 (left half of nodes and green edge) differentially**  
261 **methyated gene sets for female offspring exposed to maternal HFD.**

262 The size of the nodes represents the number of genes, while the color indicates the FDR p-value.

263 The edges between the nodes indicate shared genes, with edge thickness representing the number  
264 of genes in common.

265

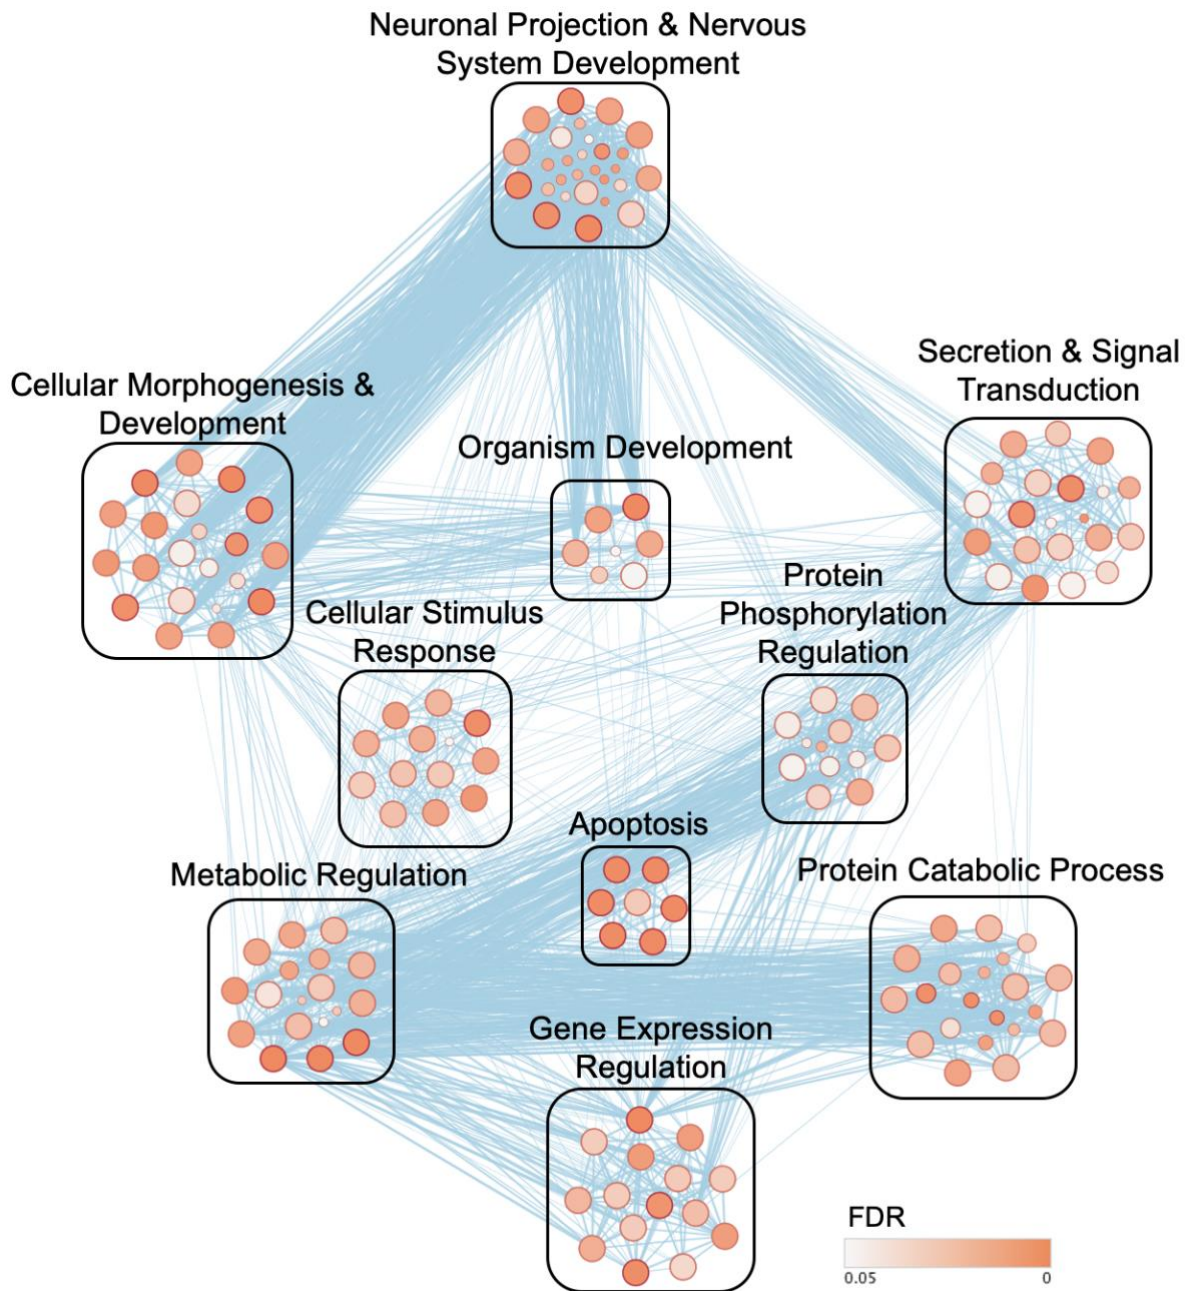

266  
267

268 **Fig 7. gProfiler clusters of Gene Ontology (GO) Biological Process terms significantly**  
269 **enriched at P7 in female offspring in response to maternal HFD exposure in the amygdala.**

270 The size of the nodes represents the number of genes, while the color indicates the FDR p-value.

271 The edges between the nodes indicate shared genes, with edge thickness representing the number

272 of genes in common.



273

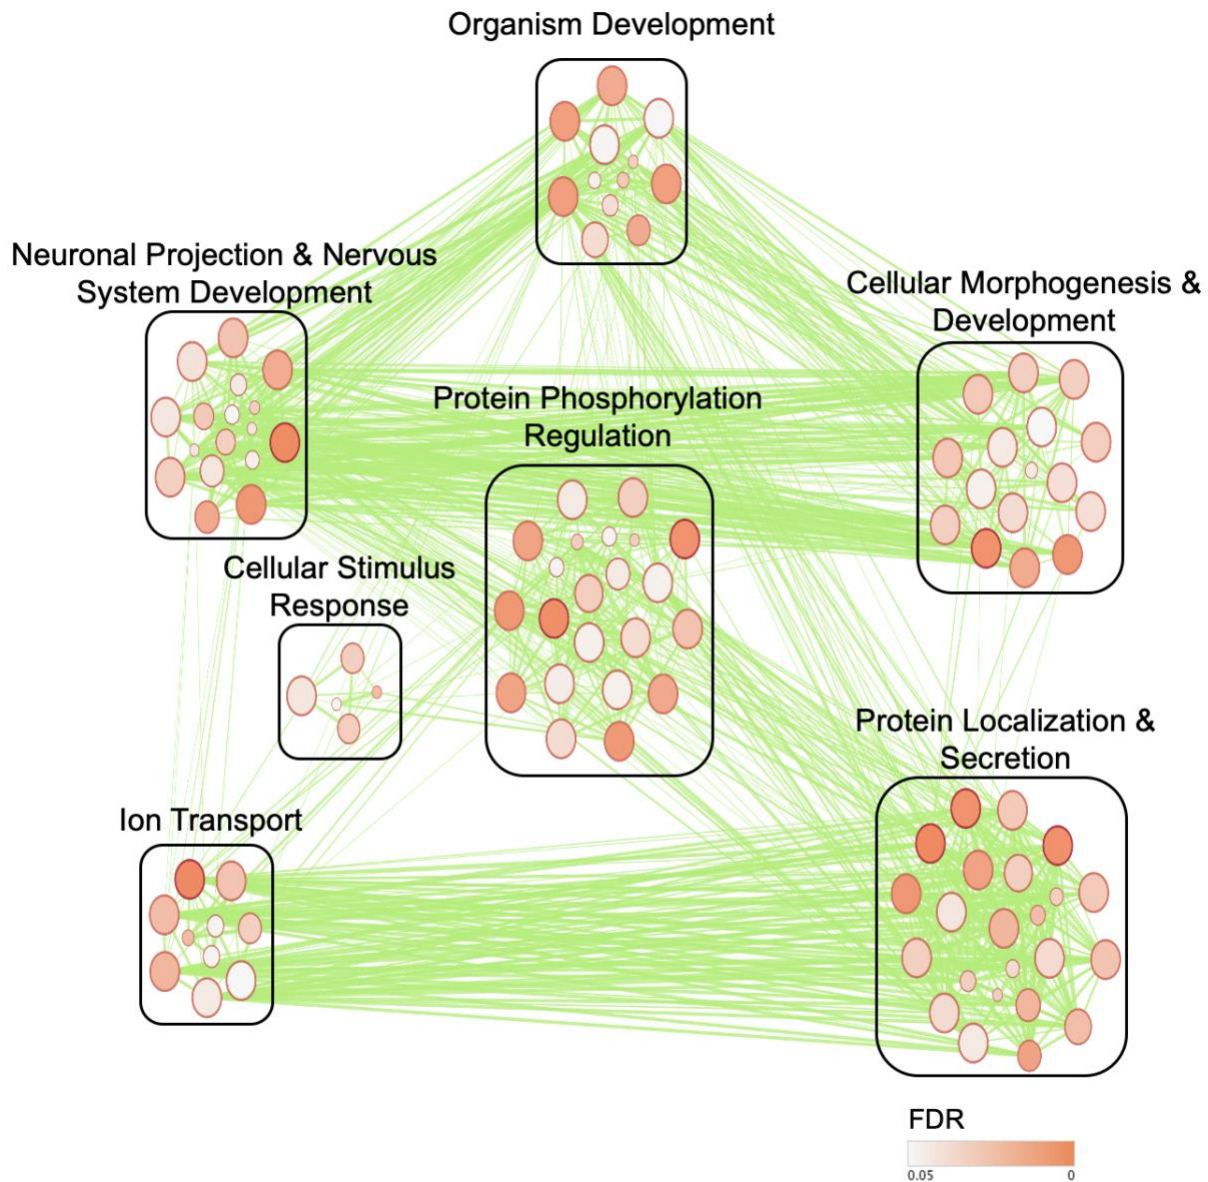

274

275

276 **Fig 8. gProfiler clusters of Gene Ontology (GO) Biological Processes terms significantly**

277 **enriched at P90 in female offspring in response to maternal HFD exposure in the amygdala.**

278 The size of the nodes represents the number of genes, while the color indicates the FDR p-value.

279 The edges between the nodes indicate shared genes with edge thickness representing the number

280 of genes in common.

281



282 **Table 2.** Common KEGG pathways enriched by the genes identified from DMR analysis at P7  
 283 and P90 in response to maternal HFD exposure in female amygdala along with their FDR values  
 284 and list of enriched genes.

| ID             | Description                      | P7 FDR   | P90 FDR  | P7 Genes                                                                                                 | P90 Genes                                                                           |
|----------------|----------------------------------|----------|----------|----------------------------------------------------------------------------------------------------------|-------------------------------------------------------------------------------------|
| KEGG<br>:04010 | MAPK<br>signaling<br>pathway     | 4.98E-03 | 4.47E-02 | MAPK10,RPS6KA<br>6,MAP3K14,RPS6<br>KA3,CACNA1C,C<br>ACNA1F,RASGR<br>F1,NFATC1,<br>MAP3K4,DUSP9,<br>FGF16 | CACNA1C,MAP<br>3K6,MECOM,CA<br>CNA1D,NFATC1<br>,NTRK2,NFKB1,<br>CACNA2D3,<br>FGF13  |
| KEGG<br>:04020 | Calcium<br>signaling<br>pathway  | 5.30E-03 | 2.93E-03 | PLCD3,CACNA1C<br>,SLC8A1,CACNA<br>1F,SPHK1,HTR2C<br>,PLCB4,<br>CAMK2B,ATP2B3                             | NOS1,P2RX7,M<br>YLK,ITPKB,PH<br>KA1,ADCY8,CA<br>CNA1C,EDNRB,<br>CACNA1D,<br>SLC25A5 |
| KEGG<br>:04022 | cGMP-PKG<br>signaling<br>pathway | 8.64E-03 | 5.38E-03 | CACNA1C,SLC8A<br>1,CACNA1F,NFA<br>TC2,NFATC1,MR<br>VI1,PLCB4,ATP2<br>B3                                  | ATF6B,MYLK,A<br>DCY8,CACNA1<br>C,EDNRB,CACN<br>A1D,NFATC1,G<br>UCY1A2,<br>SLC25A5   |
| KEGG<br>:04024 | cAMP<br>signaling<br>pathway     | 2.73E-03 | 1.21E-02 | MAPK10,CACNA<br>1C,GRIA3,ABCC4<br>,CACNA1F,GRIN3<br>B,NFATC1,TIAM1<br>,CAMK2B,                           | ADCY8,CACNA<br>1C,GABBR2,CA<br>CNA1D,NFATC1<br>,VAV3,TIAM1,N<br>FKB1,               |

|                |                                  |          |          | ATP2B3                                                                          | RAPGEF3                                                                                      |
|----------------|----------------------------------|----------|----------|---------------------------------------------------------------------------------|----------------------------------------------------------------------------------------------|
| KEGG<br>:04360 | Axon<br>guidance                 | 6.80E-04 | 9.09E-03 | FYN,NTN1,PAK3,<br>EFNB1,NFATC2,R<br>GS3,SLIT1,SEMA<br>6B,CAMK2B,BMP<br>7,PLXNA3 | FYN,EPHB1,DP<br>YSL5,EPHB2,LI<br>MK2,SEMA4A,R<br>GS3,PARD3,BM<br>P7                          |
| KEGG<br>:04530 | Tight<br>junction                | 2.69E-02 | 1.52E-03 | RUNX1,MAPK10,<br>RAP2C,DLG3,TIA<br>M1,ARHGEF18,E<br>PB41L4B                     | DLG3,MYH10,S<br>LC9A3R1,CLDN<br>11,CACNA1D,TJ<br>P3,TIAM1,MAGI<br>1,ARHGEF18,PA<br>RD3,CGNL1 |
| KEGG<br>:04713 | Circadian<br>entrainment         | 3.82E-02 | 1.41E-02 | CACNA1C,GRIA3<br>,PER3,<br>PLCB4,CAMK2B                                         | NOS1,ADCY8,C<br>ACNA1C,CACN<br>A1D,GNG7,GUC<br>Y1A2                                          |
| KEGG<br>:04921 | Oxytocin<br>signaling<br>pathway | 6.94E-03 | 2.84E-02 | CDKN1A,CACNA<br>1C,CACNA1F,NF<br>ATC2,EEF2K,NFA<br>TC1,PLCB4,CAM<br>K2B         | MYLK,ADCY8,<br>CACNA1C,CAC<br>NA1D,NFATC1,<br>GUCY1A2,CAC<br>NA2D3                           |

285

286

## 287 **Discussion**

288           In this study, we examined the effects of mHFD exposure on lactation-specific miRNAs  
289 that inhibit DNMTs, as well as changes in genome-wide DNA methylation modifications in  
290 offspring in early life and adulthood. Members of the lactation-specific miR-148/152 family and  
291 miR-21 exhibited decreased abundance in ingested stomach milk and the amygdala of mHFD  
292 offspring in early life. Correspondingly, we observed increased transcript abundance of DNMT1  
293 and MeCP2 in response to mHFD in neonates. Total DNMT enzymatic activity and global LINE-  
294 1-5mC (%) levels also increased in the amygdala in early life, but not in adulthood. Genes  
295 regulating the DNMT machinery as well as neurodevelopment were differentially methylated  
296 across the two ages.

297           Female pups exposed to mHFD showed a reduction in miR-152-5P and miR-21-5P in  
298 their stomach milk (Fig. 1A) and a reduction in miR-148a-5P and miR-152-3P levels in the  
299 amygdala during early life compared to mCHD offspring (Fig. 1B). These findings support  
300 previous research indicating that lactation-specific miRNAs belonging to miR-148/152 family  
301 survive the digestive tract (likely encapsulated in stable milk-derived exosomes), are absorbed  
302 across offspring's intestinal barrier, and are subsequently transported to target neural tissues in  
303 rodents. Indeed, several previous studies have shown that milk-derived exosomes survive  
304 degradation in the GI tract (Benmoussa et al., 2016; Izumi et al., 2015, 2012; Zhou et al., 2012)  
305 and can be absorbed across the intestinal barrier (Modepalli et al., 2014), especially during early  
306 life when gut permeability is high (Gareau, 2011). Milk-derived exosomes have also been shown  
307 to successfully cross the blood brain barrier of the recipient and have unique distribution patterns  
308 (Chen et al., 2016; Manca et al., 2018). Interestingly, several studies have failed to detect  
309 endogenously produced miR-148/152 family in peripheral organs including the liver and heart and

310 in several regions of the CNS, including cerebellum, thalamus, hippocampus, and spinal cord of  
311 adult rats using time dependent expression profiles generated from small RNA sequencing and  
312 microarray analyses (Izumi et al., 2014; Minami et al., 2014; Smith et al., 2016). Although we  
313 cannot definitively rule out endogenous expression of the miRNAs examined in this study, our  
314 findings are consistent with evidence that these miRNAs are likely of maternal origin and are  
315 transferred via milk during early life (Alsaweed et al., 2016; Manca et al., 2018).

316 We found a strong inverse correlation between levels of lactation-specific miRNAs and  
317 DNMT expression, where miR-148/152 and miR-21 levels decreased, while DNMT1 and MeCP2  
318 levels increased in the amygdala in early life among mHFD offspring (Fig. 2A). These findings  
319 concur with other studies showing post-transcriptional regulation of DNMT1 by the miR-148//152  
320 family. For example, increased expression of miR-152 during lactation in dairy cows has been  
321 linked to a marked reduction of DNMT1 mRNA and protein expression in mammary glands  
322 (Wang et al., 2014). This reduction is associated with a decrease in global DNA methylation in  
323 bovine mammary glands. Likewise, a strong inverse relationship was previously shown between  
324 miR-148a and miR-21 and DNMT1 expression in bovine maternal epithelial cell culture (Long et  
325 al., 2014; Pan et al., 2010; Xu et al., 2013). In human milk, miR-148a has also been shown to  
326 downregulate the expression of DNMT1 *in vitro* (Golan-Gerstl et al., 2017). DNMT1 is known to  
327 recruit MeCP2 to methylated loci, inducing transcriptional repression (Chen et al., 2015).  
328 Interestingly, our data also show evidence of increased expression of MeCP2 (Fig. 2A) that is  
329 positively associated with increased DNMT1 levels and inversely associated with miR-148/152  
330 transcript levels. Further, *in silico* analysis has predicted MeCP2 to be a direct post-transcriptional  
331 target of miR-152-3P, however to our knowledge there is no experimental evidence confirming  
332 this prediction to date (Ehrhart et al., 2016; [www.targetscan.org](http://www.targetscan.org)).

333 DNMT expression in offspring is known to be responsive to changes in the maternal  
334 nutritional environment. For example, maternal dietary protein restriction was associated with a  
335 decrease in DNMT1 expression in the liver of adult offspring (Lillycrop et al., 2007), and mHFD  
336 consumption was associated with a decrease in DNMT3a expression in the hippocampus of fetal  
337 male rats (Glendining et al., 2018). Similarly, we found that transcript abundance of DNMT1 in  
338 the amygdala was sensitive to changes in maternal diet during early life. However, in adulthood  
339 transcript abundance of DNMTs and other epigenetic regulators remained unchanged between diet  
340 groups (Fig. 2B). Notably, the increase in DNMT1 and MeCP2 expression in early life in the  
341 amygdala was associated with a robust increase in DNMT enzymatic activity (Fig. 3A) and global  
342 LINE-1 DNA methylation (Fig. 3B). It has been reported that DNMT1 and MeCP2 form a complex  
343 on hemimethylated DNA to regulate DNMT activity (Kimura and Shiota, 2003). The strong  
344 association between reduced miR-148/152 levels with increased expression of DNMT1 and  
345 MeCP2, combined with increased DNMT enzymatic activity and global DNA methylation suggest  
346 a mechanism by which mHFD exposure may program the DNA methylome of offspring during  
347 early life, and an important regulatory role for lactation-specific miR-148/152 in this process.

348 We also examined whether changes in DNA methylation patterns we observed during early  
349 life were maintained into adulthood, long after the period of mHFD exposure. In adulthood,  
350 DNMT enzymatic activity showed a decreasing trend (Fig. 4A), along with a significant reduction  
351 in global DNA methylation levels in offspring exposed to mHFD (Fig. 4B). These findings support  
352 previous reports showing persistent global DNA hypomethylation in adult offspring exposed to  
353 mHFD (Carlin et al., 2013; Vucetic et al., 2010).

354 Next, we examined genome-wide DNA methylation patterns at single nucleotide resolution  
355 using RRBS. Over 60% of mHFD-associated DMRs showed hypomethylation and approximately

356 50% were found in intergenic regions (Fig. 5A). Notably, the proportion of DMRs found within  
357 promoter regions was substantially higher in early life (21%) compared to adulthood (6%). It is  
358 possible that this higher proportion of differential DNA methylation in promoters may be linked  
359 to the rapid neurodevelopmental processes that are taking place during the first week of postnatal  
360 life. Earlier studies have reported unique temporal patterns of DNA methylation modifications in  
361 the brain during perinatal life, where a reversal in the direction of genomewide methylation occurs  
362 from prenatal to postnatal development (Lister et al., 2013; Numata et al., 2012). In particular,  
363 global methylation levels were shown to decrease during prenatal life and increase postnatally  
364 (Numata et al., 2012). However, it should be noted that P7 animals in this study were still under  
365 the direct influence of the mHFD and its associated metabolic milieu, conditions that were not  
366 present in adulthood, as the animals were weaned onto a control diet. Interestingly, we found that  
367 exposure to mHFD during perinatal life also lead to increased global LINE-1 methylation in the  
368 amygdala (see Fig. 3B). Taken together, our data suggest an increased period of sensitivity of the  
369 neural DNA methylome to dietary stress in early life.

370 We found a total of 57 shared DMRs in both early life and adulthood (Fig. 5B),  
371 corresponding to 26 genes annotated to these regions (Table 1). Interestingly, the promoter region  
372 of MeCP2 was hypomethylated in response to mHFD across both ages (Table 1); we also observed  
373 an increase in the relative transcript abundance of MeCP2 in early life (see Fig. 2A). Indeed,  
374 studies have shown that methylation of CpG sites of six previously characterized *cis* regulatory  
375 sequences, which are found in MeCP2 promoter and intron 1, is inversely correlated with MeCP2  
376 transcript abundance level (Liyanage et al., 2019; Olson et al., 2014). In contrast to early life,  
377 MeCP2 transcript abundance in adulthood remained unchanged between offspring exposed to  
378 mHFD and mCHD (Fig. 2B), despite the apparent maintenance of promoter hypomethylation

379 among mHFD offspring. These findings suggest an alternate mode of transcriptional control of  
380 MeCP2. Post-transcriptional regulation of MeCP2 by polyadenylation and a number of micro-  
381 RNAs during development has been reported (McGowan and Pang, 2015; Samaco et al., 2004).  
382 Polyadenylation of MeCP2 transcript results in a longer 3'UTR that has been shown to be highly  
383 expressed in the brain at birth, decrease progressively during postnatal development, and increase  
384 again in adulthood, regulated by RNA-binding proteins and mirco-RNAs (McGowan and Pang,  
385 2015; Rodrigues et al., 2016; Samaco et al., 2004).

386 MeCP2 is associated with the regulation of differentially expressed genes in offspring  
387 exposed to mHFD. For example, mHFD exposed animals show reduced  $\mu$ -opioid receptor  
388 transcript abundance, promoter hypermethylation, and increased recruitment of MeCP2 to the  $\mu$ -  
389 opioid receptor promoter in reward-related brain regions, including the ventral tegmental area,  
390 prefrontal cortex, and nucleus accumbens (Vucetic et al., 2011). In addition, MeCP2 is known to  
391 regulate the expression of brain-derived-neurotrophic factor (BDNF) in a dynamic mechanism that  
392 could either repress or activate its expression (reviewed in Li and Pozzo-Miller, 2014). Studies  
393 have shown a reduction in BDNF transcript levels in several brain regions including the prefrontal  
394 cortex, hippocampus, and hypothalamus in developing animals exposed to mHFD (Bae-Gartz et  
395 al., 2019; Rincel et al., 2016; Tozuka et al., 2009). It is possible that DNA methylation  
396 modifications and changes in transcript abundance in MeCP2 in response to mHFD are involved  
397 in the differential gene expression reported in the brains of mHFD offspring.

398 We identified overlapping GO terms (Fig. 6; Supplementary Table 4) and KEGG pathways  
399 (Table 2) that were enriched with differentially methylated genes in early life and adulthood to  
400 contextualize differentially methylated genes associated with mHFD exposure. GO terms  
401 associated with the development of the nervous system (i.e. neurogenesis, neuron development,

402 and nervous system development) and neuronal projections (i.e. neuron projection morphogenesis,  
403 axonogenesis, plasma membrane bounded cell projection organization), as well as axon guidance  
404 KEGG pathway were highly enriched with genes annotated to DMRs in early life and adulthood.  
405 Several earlier studies have reported altered neuronal morphology in brain limbic regions with  
406 exposure to mHFD. Specifically, new hippocampal neurons exhibit impaired dendritic  
407 arborization in young mice (P35) exposed to mHFD, which was associated with reduced BDNF  
408 and impaired spatial learning (Tozuka et al., 2009). Another study showed that mHFD is associated  
409 with reduced dendritic length and complexity in the hippocampus and amygdala of adult rat  
410 offspring (Janthakhin et al., 2017). Young and adult mouse offspring exposed to mHFD exhibit  
411 reduced stability and loss of dendritic spines (Hatanaka et al., 2015). Taken together, our finding  
412 may implicate DNA methylation modifications in these effects, though this remains to be  
413 examined more in detail.

414           The enrichment analysis also identified age-specific GO terms and KEGG pathways  
415 (Fig. 7-8; Supplementary Table 7-8). In early life, GO terms and KEGG pathways involving  
416 neuronal development, such as axon guidance, Wnt signaling, neurotrophin signaling and thyroid  
417 hormone signaling pathways were enriched with DMRs. Interestingly, previous studies have  
418 linked changes in thyroid hormone levels and genes involved in thyroid synthesis to mHFD  
419 exposure in offspring across several species, including humans, rodents, (Kahr et al., 2016;  
420 Tabachnik et al., 2017) as well as primates (Suter et al., 2012). In particular, thyroid hormone  
421 levels and the genes that mediate thyroid hormone synthesis decreased in the hypothalamus and  
422 thyroid gland in human fetuses that were exposed to an obesogenic maternal environment (Suter  
423 et al., 2012). Our findings implicating DNA methylation modifications in thyroid hormone  
424 signaling pathways thus warrant further investigation. In adulthood, glutamatergic and



425 GABAergic KEGG pathways were enriched with genes annotated to DMRs (Supplementary Table  
426 8). Anxiety-like behaviour is a well-characterized outcome of dysregulation in glutamatergic and  
427 GABAergic systems, and these findings concur with previously published studies showing  
428 heightened anxiety-like behaviours in mHFD offspring (Bilbo and Tsang, 2010; Peleg-Raibstein  
429 et al., 2012; Sasaki et al., 2013).

## 430 **Conclusion**

431 Maternal milk is a primary source of nutrition in early life in mammals, and plays an  
432 important role in growth, neurodevelopment, immunity, microbiome composition, and behaviour  
433 (Andreas et al., 2015; Bagnell and Bartol, 2019; Ballard and Morrow, 2013; Boquien, 2018; De  
434 Leoz et al., 2015; Der et al., 2006; Dettmer et al., 2018; Gareau, 2011; Hamosh, 2001).  
435 Collectively, our findings suggest a role for lactation-specific miRNAs in neurodevelopmental  
436 programming of the DNA methylome by mHFD. With the significant rise worldwide in the  
437 number of women of reproductive age who are overweight or obese, understanding the role of  
438 miRNA transfer via maternal milk during early development may help identify mechanisms that  
439 lead to adverse health outcomes in children, and ultimately enable preventive and therapeutic  
440 interventions to support offspring health.

441

## 442 **Materials and Methods**

### 443 **Animal Treatment and Handling**

444 Adult female Long Evans rats (7 week) were purchased from Charles River, Canada (St.  
445 Constant, QC) and housed with same sex pairs until mating and maintained on a 12:12 - h light–  
446 dark cycle (lights on 7:00 am–7:00 pm) with *ad libitum* access to food and water. Females were  
447 maintained on either house chow diet (mCHD; 5001; Purina Lab Diets, St. Louis, MO, USA)

448 consisting of 28.5 % protein, 13.5 % fat, and 58 % carbohydrate, or a high fat diet (mHFD;  
449 D12492; Research Diets Inc. New Brunswick, NJ, CA), consisting of (by kcal): 20 % protein,  
450 60 % fat, 20 % carbohydrate) 4 weeks prior to mating, during gestation, and lactation (Abuaish et  
451 al., 2018; Sasaki et al., 2014, 2013). Mating was conducted over a one-week period and sperm  
452 plugs were checked twice a day to determine the onset of pregnancy. Females were then separated  
453 from males and singly housed throughout pregnancy. After parturition, dams were moved into  
454 clean cages and offspring were weighed and culled to 12 pups / litter (6 males and 6 females) when  
455 possible.

456 At sacrifice, female P7 neonates were individually removed from their litters, rapidly  
457 decapitated; brains and curd stomach milk were collected. Female P90 adults were sacrificed by  
458 CO<sub>2</sub> inhalation followed by decapitation to collect brains. Separate litters of animals were used for  
459 the various assays: n=4 animals (1/litter/diet group) for LINE-1, DNMT activity, and qPCR  
460 analyses at P7; n=4 animals (1/litter/diet group) for RRBS and qPCR analyses at P7; n=4 animals  
461 (1/litter/diet group) for milk miRNA analysis at P7; n=4-6 (1/litter/diet group) for LINE-1, DNMT  
462 activity and qPCR analyses at P90; and n=4 (1/litter/diet group) for RRBS analysis at P90. Brains  
463 obtained from all animals were flash frozen in isopentane and dry ice and stored at -80 °C for later  
464 usage. Brains were cryosectioned into 50 µM sections using Research Cryostat Leica CM3050 S  
465 (CM3050 S; Leica Biosystems, Concord, ON, CAD) and the amygdala was microdissected using  
466 stereotaxic coordinates (P7: bregma: -0.20mm to -1.60 mm (Paxinos et al., 1991); P90 bregma:  
467 -1.72mm to -3.00mm (Paxinos and Watson, 2007).

468 We focused on female offspring in this study for several reasons. First, earlier  
469 investigations found greater transcriptional differences in the brains of female offspring compared  
470 to male offspring exposed to mHFD in early life (Abuaish et al., 2018; Barrand et al., 2017; Sasaki

471 et al., 2014) and in adulthood (Sasaki et al., 2013). Second, adult female offspring showed stronger  
472 behavioral and physiological alterations in response to mHFD, in comparison to male littermates  
473 (Sasaki et al., 2013). These alterations were associated with pronounced changes in gene  
474 expression in the amygdala (Sasaki et al., 2013).

475 All experimental protocols were approved by the Local Animal Care Committee at the  
476 University of Toronto, Scarborough, and were in accordance with the guidelines of the Canadian  
477 Council on Animal Care.

#### 478 **RNA Extraction from Stomach Milk and Amygdala**

479 Total RNA, >18 nucleotides, was purified from curd stomach milk collected from P7  
480 offspring that were exposed to mCHD (n=4) or mHFD (n=4) using a combination of QIAzol and  
481 miRNeasy Mini Kit (217004; Qiagen, Toronto, ON, CA) as described previously (Izumi et al.,  
482 2014, 2013). RNA was extracted from the amygdala of female offspring at P7 and P90  
483 (n=6/mCHD, n=6/mHFD) using TRIzol Reagent (15596018; ThermoFisher Scientific, Ottawa,  
484 ON, CAD) according to manufacturer's instructions. RNA concentration and quality were  
485 measured using a Nanodrop Spectrophotometer (ND-2000C; ThermoFisher Scientific) and  
486 RapidOut DNA Removal Kit (K2981; ThermoFisher Scientific) was used to remove sources of  
487 genomic DNA contamination. The samples were stored at -80 °C for future use.

#### 488 **miRNA Primer Design**

489 miRNA-specific forward primers for miR-148-5P, 148-3P, 152-5P, 152-3P, and miR-21-  
490 5P were designed using annotated mature miRNA sequences obtained from miRBase (Kozomara  
491 and Griffiths-Jones, 2011) for *Rattus norvegicus*, using a protocol previously described (Biggar et  
492 al., 2014). All miRNA targets were quantified in conjunction with a universal reverse primer  
493 (Supplementary Table 1) and a miRNA target-specific forward primer (Supplementary Table 1).

494 Four reference genes (U6 snRNA, 5S rRNA, Snord 96a, and Snord 95a) were tested to determine  
495 a set of most stable internal controls to be used for data normalization (Supplementary Table 1).  
496 Sequences for the internal reference genes, were based on previously published work on rodent-  
497 specific miRNA regulation in the brain (Eacker et al., 2011; Minami et al., 2014).

#### 498 **miRNA Expression Analysis by RT-qPCR**

499 125 ng of total RNA extracted from curd stomach milk and 1 µg of total RNA extracted  
500 from the amygdala of the same animals at P7 were processed for miRNA analysis as previously  
501 described (Biggar et al., 2014, 2011). miRNA levels in stomach milk and amygdala of P7 offspring  
502 were quantified using a StepOne Plus real-time thermocycler with Fast SYBR Green PCR master  
503 mix (4385612; Applied Biosystems, Foster City, CA, USA) using a previously established  
504 protocol (Biggar et al., 2014). A melt curve analysis was done following each RT-qPCR reaction  
505 to ensure that miRNA primers did not yield multiple PCR products.

506 Five lactation-specific miRNAs were quantified in ingested stomach milk (miR-148-5P,  
507 miR-148-3P, miR-152-5P, miR-152-3P, and miR-21-5P) and four of the same miRNAs were  
508 quantified in the amygdala at P7 (miR-148-5P, miR-148-3P, miR-152-5P, and miR-152-3P;  
509 Supplementary Table 1). miR-21-5P was below the detectable range by RT-qPCR in the amygdala  
510 at P7. miRNA quantification was done using  $\Delta\Delta C_q$  method and all targets were normalized against  
511 the GEOMEAN of two internal reference genes. U6 snRNA and 5S rRNA were determined to be  
512 suitable internal controls for both stomach milk and amygdala datasets by NormFinder software  
513 (Andersen et al., 2004). Relative miRNA levels were denoted as mean  $\pm$  SEM representing n=4  
514 (stomach milk) and n=6 (amygdala) biological replicates per experimental condition and three  
515 technical replicates per biological replicate. Significant differences across mCHD and mHFD

516 exposures were measured using an independent sample Student's t-test with a 95 % confidence  
517 interval ( $p < 0.05$ ).

### 518 **mRNA Expression Analysis by RT-qPCR**

519 Gene expression levels of DNMT1, DNMT3a, DNMT3b, MeCP2, and GADD45 were  
520 measured using a StepOne Plus real-time thermocycler with a Fast SYBR Green PCR master mix  
521 (4385612; Applied Biosystems) in the amygdala during early life and adulthood. A melt curve  
522 analysis was done following each RT-qPCR reaction to ensure that primers did not yield multiple  
523 PCR products. Primers (Supplementary Table 1) were designed using nucleotide sequence  
524 information available at the National Center for Biotechnology Information (NCBI):  
525 [www.ncbi.nlm.nih.gov](http://www.ncbi.nlm.nih.gov) and previously published research (Sasaki et al., 2014, 2013).

526 mRNA quantification was determined using a standard curve consisting of 11 serial  
527 dilutions ranging from 500 to 0.49 ng/ $\mu$ L. Quantity means of each target was normalized against  
528 the GEOmean of four reference genes, YWAZ, GAPDH, 18s, and Actin B. These four reference  
529 genes were determined to be suitable internal controls in the female amygdala during early life and  
530 adulthood by NormFinder Software (Andersen et al., 2004). Relative gene expression levels were  
531 denoted as mean  $\pm$  SEM representing  $n=6$  biological replicates per experimental condition and  
532 three technical replicates per biological replicate. Significant differences across mCHD and mHFD  
533 exposures were measured using an independent sample Student's t-test with a 95 % confidence  
534 interval ( $p < 0.05$ ).

### 535 **Protein Extraction**

536 Total soluble protein was extracted using the organic phase of the TRIzol extraction  
537 ( $n=6$ /mCHD,  $n=6$ /mHFD) from female amygdala. Ethanol (100%; 1:0.3 v/v to TRIzol) was added  
538 to the organic phase and centrifuged at 2,000 x g for 5 min at 4 °C to pellet the DNA. Isopropanol

539 (1:1.5 v/v to TRIzol) was added to the supernatant, incubated at RT for 10 min, and later  
540 centrifuged at 12,000 x g at 4 °C for 10 min to pellet the proteins. Protein pellet was washed 3x  
541 with 0.3 M guanidine hydrochloride in 95 % ethanol (1:2 v/v to TRIzol) followed by a single wash  
542 with 2 mL of 100 % ethanol. The pellet was air dried for 15 min and re-suspended in 200 µL of  
543 1 % SDS. The protein concentrations were measured using Pierce™ BCA Protein Assay Kit  
544 (23225; Thermo Scientific) with a Albumin BSA Standards ranging from 2000 µg/mL to 0 µg/mL  
545 using a Nanodrop Spectrophotometer cuvette system (ND-2000C; ThermoFisher Scientific).

#### 546 **DNA Methyltransferase Activity**

547 Total DNMT activity was measured using EpiQuik™ DNA Methyltransferase  
548 Activity/Inhibition Assay Kit (P-3001; Epigentek, Farmingdale, NY, USA) according to  
549 manufacturer's instructions. Briefly, a dilution curve ranging from 5 µg to 60 µg was assayed using  
550 pooled protein samples from P7 and P90 amygdala to determine the linear portion of the absorption  
551 curve along with DNMT positive controls (50 µg/mL; provided by Epigentek) and blanks  
552 (containing only assay buffer). According to the dilution curve, 50 µg of total protein was chosen  
553 as the optimal range for both P7 and P90 amygdala samples. All samples, positive controls, and  
554 blanks were run in duplicates according to manufacturer's instructions. Absorption was read using  
555 a microplate reader (Versamax; Molecular Devices) at 450 nm within 2 min.

556 Total DNMT enzymatic activity was calculated using the following formula:

557

$$558 \quad \text{DNMT Activity} \left( \frac{OD}{mg} \right) = \left( \frac{\text{No inhibitor OD} - \text{Blank OD}}{\text{Protein Amount (ug)} \times \text{hr}} \right) \times 1000$$

559

#### 560 **Genomic DNA Extraction**

561 Genomic DNA (gDNA) was extracted using ZR-Duet™DNA/RNA MiniPrep (D7005;  
562 Zymo Research, Irvine, CA, USA) according to manufacturing instructions (n=4/mCHD,  
563 n=4/mHFD). The concentration of gDNA was quantified using the Pico Green dsDNA Assay  
564 Kit (P11496; ThermoFisher Scientific).

### 565 **Global DNA Methylation**

566 Methylation of LINE-1 repeats have been implicated in several complex diseases and used  
567 as representative of global levels of DNA methylation, as LINE-1 repeats make up approximately  
568 18 % of the genome with copy number estimated at roughly half a million (Weisenberger et al.,  
569 2005). Furthermore, LINE-1 methylation has a strong association with adiposity, dietary weight  
570 gain, and body fat mass in humans (Carraro et al., 2016). As such, we used LINE-1 methylation  
571 to measure changes in global methylation and the effects of mHFD exposure on 5mC levels.  
572 Global % 5mC levels were assayed using a Global DNA Methylation LINE-1 Kit (55017; Active  
573 Motif, Carlsbad, CA, USA) according to the manufacturer's instructions. A standard curve  
574 (ranging from 0 ng to 100 ng) was prepared in triplicates using a mixture of methylated and non-  
575 methylated DNA standards. A dilution curve (ranging from 0 ng to 500 ng) consisting of pooled  
576 P7 and P90 gDNA samples were run in duplicate alongside the standard curve to determine the  
577 linear portion of the absorbance readings at 450 nm. Based on the standard curve, 250 ng of gDNA  
578 from P7 and 1 µg of gDNA from P90 were chosen for the assay. All absorption readings were  
579 taken using a microplate reader (Versamax; Molecular Devices, San Jose, CA, USA) at 450 nm  
580 with a reference wavelength of 655 nm within 5 min.

581 % 5mC levels were calculated by averaging the duplicates for the blanks and sample wells  
582 and triplicates for the standards and subtracting the average blank OD at 450 nm from the average  
583 standard ODs and sample ODs. % 5mC levels that were associated with each sample were

584 determined based on the total detectable CpG content. Using the standard curve ranging from 0 ng  
585 to 100 ng (slope = 0.0297; R<sub>2</sub>-value = 0.950), % 5mC methylation for each sample was  
586 extrapolated using MyCurveFit Beta online curve fitting software (<https://mycurvefit.com>). As the  
587 amount of DNA used was 60 ng and 80 ng for P7 and P90, respectively, the extrapolated % 5mC  
588 values were further divided by the total amount of gDNA loaded and multiplied by 100.

### 589 **Reduced Representation Bisulfite Sequencing (RRBS)**

590 gDNA from P7 and P90 female amygdala used for the global methylation assay was also  
591 used for RRBS analysis. Briefly, 100 ng of genomic DNA was used to construct libraries for RRBS  
592 using the Ovation RRBS Methyl-Sequencing Kit (0553-32; NuGEN, Redwood City, CA, USA)  
593 as per the manufacturer's instructions. The EpiTect Fast DNA Bisulfite Kit (59824; Qiagen) was  
594 used for bisulfite conversion. Libraries were sequenced on a NextSeq 500 (Illumina, San Diego,  
595 CA, USA) at the Princess Margaret Genomics Centre (University Health Network, Toronto) using  
596 single end sequencing with a 75-base pair read length and multiplexed at 8–10 samples per  
597 flowcell. Samples sequenced were as follows; for P7, mCHD: n=4 and mHFD: n=4 and for P90,  
598 mCHD: n=6 and mHFD: n=4.

### 599 **DNA Methylation Analysis**

600 RRBS fastq files were processed as per our previous study. Files were trimmed to remove  
601 low quality reads (q < 30) and adaptors, and later aligned to RGD Rnor\_6.0 (Ashbrook et al.,  
602 2018). The average reads per sample was 20.8X10<sup>6</sup> with a mapping efficiency of 50-60 %.  
603 Differentially methylated regions (DMRs) were identified using a dynamic sliding window  
604 approach and annotated using the methylPipe (Song et al., 2013) and compEpiTools R packages  
605 (Kishore et al., 2015). The bisulfite conversion rate was >99 % for all samples. Regions were



606 declared to be differentially methylated if the average methylation of at least 10 consecutive CpG  
607 sites within a 1 Kb region was  $\geq 5\%$  between mHFD and mCHD with FDR  $< 0.05$ .

### 608 **Gene Set Enrichment Analysis**

609 Set of differentially methylated genes identified by the DMR analysis were explored using  
610 Gene Ontology Biological Processes (GO BP) (Ashburner et al., 2000; Blake et al., 2015) and  
611 KEGG pathway enrichment analysis (Kanehisa et al., 2012) to examine functionally annotated  
612 gene pathways and networks. Enrichment analysis was performed using gProfiler (Reimand et al.,  
613 2016) with a FDR  $\leq 0.05$  cutoff for statistical significance.

614 Networks of GO terms were constructed and visualized using Enrichment Map on  
615 Cytoscape 3.6.1 (Merico et al., 2010). Clusters were arranged and labeled using the yFiles  
616 algorithm and WordCloud plugin on Cytoscape 3.6.1. GO analysis was also performed using  
617 DAVID algorithm to compare to the results generated by gProfiler.

### 618 **Statistical analysis**

619 Statistical analysis was carried out using SPSS version 25 (IBM) and figures were  
620 constricted using GraphPad Prism7. A Shapiro-Wilk test was used to test for normality for all  
621 datasets. All data exhibited a normal distribution and thus parametric analyses were carried out.  
622 Maternal and offspring bodyweights were analyzed using repeated measures analysis of variance  
623 (ANOVA) Diet X Time. Dam's caloric intake, offspring relative transcript abundance of miRNA  
624 and mRNA targets, DNMT enzymatic activity (OD/h/mg), and the global LINE-1 DNA  
625 methylation (%), between mCHD and mHFD were analyzed using a two-tailed student t-test with  
626 a 95 % confidence interval. Pearson correlation analysis was used to assess the relationship  
627 between DNMT activity and % global DNA methylation levels. All relationships were considered  
628 statistically significant at  $p \leq 0.05$ .

629

630 **Acknowledgements**

631

632 This work was supported by a discovery grant from the Natural Sciences and Engineering

633 Research Council (NSERC) of Canada to Dr. Patrick O. McGowan. Dr. Sameera Abuaish was

634 supported by a Graduate fellowship from Princess Nourah bint Abdulrahman University. Dr.

635 Sanoji Wijenayake holds a NSERC postdoctoral research fellowship.

636 **Competing Interests**

637 No financial or non-financial competing interests are associated with this manuscript.

638 **Author Contribution:**

639 S.A, S.W, and P.O.M contributed to the experimental design, conceptualization, and wrote the

640 paper.

641 S.A contributed to animal testing and sample collections for the P7 cohort, generated RRBS

642 libraries, and performed enrichment and network analysis.

643 S.W contributed to miRNA measurements and analysis, DNMT enzymatic assays and LINE-1

644 methylation assays.

645 W.C.D contributed to RRBS library construction of P90 samples, performed all bioinformatics

646 analysis of the sequencing data and generated the DMRs datasets.

647 S.A, S.W, W.C.D contributed to gDNA, RNA, and protein extractions from P7 and P90 samples.

648 S.W and C.W.M.L contributed to P7 and P90 qPCR measurements.

649 A.S contributed to P90 animal testing and sample collections.

650 **Data availability:**

651 The data sets generated and/or analyzed during the current study are available from the

652 corresponding author on request.

653 **Bibliography**

- 654 Abuaish S, Spinieli R, McGowan P. 2018. Perinatal high fat diet induces early activation of  
655 endocrine stress responsivity and anxiety-like behavior in neonates.  
656 *Psychoneuroendocrinology* **98**:11–21. doi:10.1016/j.psyneuen.2018.08.003
- 657 Alsaweed M, Lai C, Hartmann P, Geddes D, Kakulas F. 2016. Human milk miRNAs primarily  
658 originate from the mammary gland resulting in unique miRNA profiles of fractionated milk.  
659 *Sci Rep* **6**:20680. doi:10.1038/srep20680
- 660 Andersen C, Jensen J, Falck Ørntoft T. 2004. Normalization of real-time quantitative reverse  
661 transcription-PCR data: A model-based variance estimation approach to identify genes  
662 suited for normalization, applied to bladder and Cclon cancer data sets. *Cancer Res* **5245**–  
663 **5250**. doi:10.1158/0008-5472.CAN-04-0496
- 664 Andreas NJ, Kampmann B, Mehring Le-Doare K. 2015. Human breast milk: A review on its  
665 composition and bioactivity. *Early Hum Dev* **91**:629–635.  
666 doi:10.1016/j.earlhumdev.2015.08.013
- 667 Ashbrook D, Hing B, Michalovicz L, Kelly K, Miller J, de Vega W, Miller D, Broderick G,  
668 O’Callaghan J, McGowan P. 2018. Epigenetic impacts of stress priming of the  
669 neuroinflammatory response to sarin surrogate in mice: A model of Gulf War illness. *J*  
670 *Neuroinflammation* **15**:1–15. doi:10.1186/s12974-018-1113-9
- 671 Ashburner M, Ball C, Blake J, Botstein D, Butler H, Cherry J, Davis A, Dolinski K, Dwight S,  
672 Eppig J, Harris M, Hill D, Issel-Tarver L, Kasarskis A, Lewis S, Matese J, Richardson J,  
673 Ringwald M, Rubin G, Sherlock G. 2000. Gene Ontology: tool for the unification of  
674 biology. *Nat Genet* **25**:25–29. doi:10.1038/75556
- 675 Bae-Gartz I, Janoschek R, Breuer S, Schmitz L, Hoffmann T, Ferrari N, Branik L, Oberthuer A,

- 676 Kloppe CS, Appel S, Vohlen C, Dötsch J, Hucklenbruch-Rother E. 2019. Maternal Obesity  
677 Alters Neurotrophin-Associated MAPK Signaling in the Hypothalamus of Male Mouse  
678 Offspring. *Front Neurosci* **13**:1–17. doi:10.3389/fnins.2019.00962
- 679 Bagnell CA, Bartol FF. 2019. Relaxin and the ‘Milky Way’’: The lactocrine hypothesis and  
680 maternal programming of development.’ *Mol Cell Endocrinol* **487**:18–23.  
681 doi:10.1016/j.mce.2019.01.003
- 682 Baier S, Nguyen C, Xie F, Wood J, Zemleni J. 2014. MicroRNAs are absorbed in biologically  
683 meaningful amounts from nutritionally relevant doses of cow milk and affect gene  
684 expression in peripheral blood mononuclear cells, HEK-293 kidney cell cultures, and mouse  
685 livers. *J Nutr* **144**:1495–1500. doi:10.3945/jn.114.196436
- 686 Ballard O, Morrow A. 2013. Human milk composition: nutrients and bioactive factors. *Pediatr*  
687 *Clin North Am* **60**:49–74. doi:10.1016/j.pcl.2012.10.002
- 688 Barrand S, Crowley T, Wood-Bradley R, De Jong K, Armitage J. 2017. Impact of maternal high  
689 fat diet on hypothalamic transcriptome in neonatal sprague dawley rats. *PLoS One* **12**:1–16.  
690 doi:10.1371/journal.pone.0189492
- 691 Benmoussa A, Lee C, Laffont B, Savard P, Laugier J, Boilard E, Gilbert C, Fliss I, Provost P.  
692 2016. Commercial dairy cow milk microRNAs resist digestion under stimulated  
693 gastrointestinal tract conditions. *J Nutr* **146**:2206–2215. doi:10.3945/jn.116.237651
- 694 Benmoussa A, Provost P. 2019. Milk MicroRNAs in Health and Disease. *Compr Rev Food Sci*  
695 *Food Saf* **18**:703–722. doi:10.1111/1541-4337.12424
- 696 Biggar K, Kornfeld S, Storey K. 2011. Amplification and sequencing of mature microRNAs in  
697 uncharacterized animal models using stem–loop reverse transcription–polymerase chain  
698 reaction, Analytical Biochemistry. doi:10.1016/j.ab.2011.05.015

- 699 Biggar K, Wu C, Storey K. 2014. High-throughput amplification of mature microRNAs in  
700 uncharacterized animal models using polyadenylated RNA and stem–loop reverse  
701 transcription polymerase chain reaction. *Anal Biochem* **462**:32–34.  
702 doi:10.1016/j.ab.2014.05.032
- 703 Bilbo SD, Tsang V. 2010. Enduring consequences of maternal obesity for brain inflammation  
704 and behavior of offspring. *FASEB J* **24**:2104–15. doi:10.1096/fj.09-144014
- 705 Blake J, Christie K, Dolan M, Drabkin H, Hill D, Ni L, Sitnikov D, Burgess S, Buza T, Gresham  
706 C, McCarthy F, Pillai L, Wang H, Carbon S, Dietze H, Lewis S, Mungall C, Munoz-Torres  
707 M, Feuermann M, Gaudet P, Basu S, Chisholm R, Dodson R, Fey P, Mi H, Thomas P,  
708 Muruganujan A, Poudel S, Hu JC, Aleksander S, McIntosh B, Renfro D, Siegele D, Attrill  
709 H, Brown N, Tweedie S, Lomax J, Osumi-Sutherland D, Parkinson H, Roncaglia P,  
710 Lovering R, Talmud P, Humphries S, Denny P, Campbell N, Foulger R, Chibucos M,  
711 Giglio M, Chang H, Finn R, Fraser M, Mitchell A, Nuka G, Pesseat S, Sangrador A,  
712 Scheremetjew M, Young S, Stephan R, Harris M, Oliver S, Rutherford K, Wood V, Bahler  
713 J, Lock A, Kersey P, McDowall M, Staines D, Dwinell M, Shimoyama M, Laulederkind S,  
714 Hayman G, Wang S, Petri V, D’Eustachio P, Matthews L, Balakrishnan R, Binkley G,  
715 Cherry J, Costanzo M, Demeter J, Dwight S, Engel S, Hitz B, Inglis D, Lloyd P, Miyasato  
716 S, Paskov K, Roe G, Simison M, Nash R, Skrzypek M, Weng S, Wong E, Berardini T, Li  
717 D, Huala E, Argasinska J, Arighi C, Auchincloss A, Axelsen K, Argoud-Puy G, Bateman A,  
718 Bely B, Blatter M, Bonilla C, Bougueleret L, Boutet E, Breuza L, Bridge A, Britto R,  
719 Casals C, Cibrian-Uhalte E, Coudert E, Cusin I, Duek-Roggli P, Estreicher A, Famiglietti L,  
720 Gane P, Garmiri P, Gos A, Gruaz-Gumowski N, Hatton-Ellis E, Hinz U, Hulo C, Huntley  
721 R, Jungo F, Keller G, Laiho K, Lemercier P, Lieberherr D, Macdougall A, Magrane M,

- 722 Martin M, Masson P, Mutowo P, O'Donovan C, Pedruzzi I, Pichler K, Poggioli D, Poux S,  
723 Rivoire C, Roechert B, Sawford T, Schneider M, Shypitsyna A, Stutz A, Sundaram S,  
724 Tognolli M, Wu C, Xenarios I, Chan J, Kishore R, Sternberg P, Van Auken K, Muller H,  
725 Done J, Li Y, Howe D, Westerfeld M. 2015. Gene ontology consortium: Going forward.  
726 *Nucleic Acids Res.* doi:10.1093/nar/gku1179
- 727 Boquien CY. 2018. Human Milk: An Ideal Food for Nutrition of Preterm Newborn. *Front*  
728 *Pediatr* **6**:295. doi:10.3389/fped.2018.00295
- 729 Carlin J, George R, Reyes T. 2013. Methyl donor supplementation blocks the adverse effects of  
730 maternal high fat diet on offspring physiology. *PLoS One* e63549.  
731 doi:10.1371/journal.pone.0063549
- 732 Carraro J, Mansego M, Milagro F, Chaves L, Vidigal F, Bressan J, Martínez J. 2016. LINE-1 and  
733 inflammatory gene methylation levels are early biomarkers of metabolic changes:  
734 association with adiposity. *Biomarkers* **21**:625–632. doi:10.3109/1354750X.2016.1171904
- 735 Chen C, Liu L, Ma F, Wong C, Guo X, Chacko J, Farhoodi H, Zhang S, Zimak J, Ségaliny A,  
736 Riazifar M, Pham V, Digman M, Pone E, Zhao W. 2016. Elucidation of exosome migration  
737 across the blood–brain barrier model in vitro. *Cell Mol Bioeng* **9**:509–529.  
738 doi:10.1007/s12195-016-0458-3
- 739 Chen L, Chen K, Lavery L, Baker S, Shaw C, Li W, Zoghbi H. 2015. MeCP2 binds to non-CG  
740 methylated DNA as neurons mature, influencing transcription and the timing of onset for  
741 Rett syndrome. *Proc Natl Acad Sci* **112**:201505909. doi:10.1073/pnas.1505909112
- 742 Chen Y, Wang J, Yang S, Utturkar S, Crodian J, Cummings S, Thimmapuram J, Miguel P,  
743 Kuang S, Gribskov M, Plaut K, Casey T. 2017. Effect of high-fat diet on secreted milk  
744 transcriptome in midlactation mice. *Physiol Genomics* **49**:747.

- 745           doi:10.1152/physiolgenomics.00080.2017
- 746 De Leoz MA, Kalanetra KM, Bokulich NA, Strum JS, Underwood MA, German JB, Mills DA,  
747           Lebrilla CB. 2015. Human milk glycomics and gut microbial genomics in infant feces show  
748           a correlation between human milk oligosaccharides and gut microbiota: A proof-of-concept  
749           study. *J Proteome Res* **14**:491–502. doi:10.1021/pr500759e
- 750 Der G, Batty GD, Deary IJ. 2006. Effect of breast feeding on intelligence in children:  
751           Prospective study, sibling pairs analysis, and meta-analysis. *Br Med J* **333**:945–948.  
752           doi:10.1136/bmj.38978.699583.55
- 753 Dettmer AM, Murphy AM, Guitarra D, Slonecker E, Suomi SJ, Rosenberg KL, Novak MA,  
754           Meyer JS, Hinde K. 2018. Cortisol in neonatal mother’s milk predicts later infant social and  
755           cognitive functioning in Rhesus monkeys. *Child Dev* **89**:525–538. doi:10.1111/cdev.12783
- 756 Eacker S, Keuss M, Berezikov E, Dawson V, Dawson T. 2011. Neuronal activity regulates  
757           hippocampal miRNA expression. *PLoS One* **6**:e25068. doi:10.1371/journal.pone.0025068
- 758 Ehrhart F, Coort SLM, Cirillo E, Smeets E, Evelo CT, Curfs LMG. 2016. Rett syndrome -  
759           Biological pathways leading from MECP2 to disorder phenotypes. *Orphanet J Rare Dis*.  
760           doi:10.1186/s13023-016-0545-5
- 761 Gareau MG. 2011. Diet and nerves: the impact of maternal feeding on newborn intestinal  
762           permeability. *J Physiol* **589**:4091. doi:10.1113/jphysiol.2011.215723
- 763 Glendining KA, Fisher LC, Jasoni CL. 2018. Maternal high fat diet alters offspring epigenetic  
764           regulators, amygdala glutamatergic profile and anxiety. *Psychoneuroendocrinology* **96**:132–  
765           141. doi:10.1016/j.psyneuen.2018.06.015
- 766 Golan-Gerstl R, Elbaum Shiff Y, Moshayoff V, Schechter D, Leshkowitz D, Reif S. 2017.  
767           Characterization and biological function of milk-derived miRNAs. *Mol Nutr Food Res*

- 768           **61**:1700009. doi:10.1002/mnfr.201700009
- 769   Grissom N, Herdt C, Desilets J, Lidsky-Everson J, Reyes T. 2014. Dissociable deficits of  
770           executive function caused by gestational adversity are linked to specific transcriptional  
771           changes in the prefrontal cortex. *Neuropsychopharmacology* **40**:1–11.  
772           doi:10.1038/npp.2014.313
- 773   Hamosh M. 2001. Bioactive factors in human milk. *Pediatr Clin North Am* **48**:69–86.  
774           doi:10.1016/S0031-3955(05)70286-8
- 775   Hatanaka Y, Wada K, Kabuta T. 2015. Maternal high-fat diet leads to persistent synaptic  
776           instability in mouse offspring via oxidative stress during lactation. *Neurochem Int* **97**:99–  
777           108. doi:10.1016/j.neuint.2016.03.008
- 778   Izumi H, Kosaka N, Shimizu T, Sekine K, Ochiya T, Takase M. 2014. Time-dependent  
779           expression profiles of microRNAs and mRNAs in rat milk whey. *PLoS One* **9**:e88843.  
780           doi:10.1371/journal.pone.0088843
- 781   Izumi H, Kosaka N, Shimizu T, Sekine K, Ochiya T, Takase M. 2013. Purification of RNA from  
782           milk whey. *Methods Mol Biol* **1024**:191–201. doi:10.1007/978-1-62703-453-1\_15
- 783   Izumi H, Kosaka N, Shimizu T, Sekine K, Ochiya T, Takase M. 2012. Bovine milk contains  
784           microRNA and messenger RNA that are stable under degradative conditions. *J Dairy Sci*  
785           **95**:4831–4841. doi:10.3168/jds.2012-5489
- 786   Izumi H, Tsuda M, Sato Y, Kosaka N, Ochiya T, Iwamoto H, Namba K, Takeda Y. 2015.  
787           Bovine milk exosomes contain microRNA and mRNA and are taken up by human  
788           macrophages. *J Dairy Sci* **98**:2920–2933. doi:10.3168/jds.2014-9076
- 789   Janthakhin Y, Rincel M, Costa AM, Darnaudéry M, Ferreira G. 2017. Maternal high-fat diet  
790           leads to hippocampal and amygdala dendritic remodeling in adult male offspring.



- 791 *Psychoneuroendocrinology* **83**:49–57. doi:10.1016/j.psyneuen.2017.05.003
- 792 Kahr M, Antony K, Delbeccaro M, Hu M, Aagaard K, Suter M. 2016. Increasing maternal  
793 obesity is associated with alterations in both maternal and neonatal thyroid hormone levels.  
794 *Clin Endocrinol (Oxf)* **84**:551–557. doi:10.1111/cen.12974
- 795 Kanehisa M, Goto S, Sato Y, Furumichi M, Tanabe M. 2012. KEGG for integration and  
796 interpretation of large-scale molecular data sets. *Nucleic Acids Res* **40**:D109–D114.  
797 doi:10.1093/nar/gkr988
- 798 Kimura H, Shiota K. 2003. Methyl-CpG-binding protein, MeCP2, is a target molecule for  
799 maintenance DNA methyltransferase, Dnmt1. *J Biol Chem*. doi:10.1074/jbc.M209923200
- 800 Kishore K, de Pretis S, Lister R, Morelli M, Bianchi V, Amati B, Ecker J, Pelizzola M. 2015.  
801 methylPipe and compEpiTools: A suite of R packages for the integrative analysis of  
802 epigenomics data. *BMC Bioinformatics* **16**:1–11. doi:10.1186/s12859-015-0742-6
- 803 Klein ME, Lioy DT, Ma L, Impey S, Mandel G, Goodman RH. 2007. Homeostatic regulation of  
804 MeCP2 expression by a CREB-induced microRNA. *Nat Neurosci*. doi:10.1038/nn2010
- 805 Kozomara A, Griffiths-Jones S. 2011. miRBase: integrating microRNA annotation and deep-  
806 sequencing data. *Nucleic Acids Res* **39**:D152–D157. doi:10.1093/nar/gkq1027
- 807 Lässer C, Seyed Alikhani V, Ekström K, Eldh M, Torregrosa Paredes P, Bossios A, Sjöstrand M,  
808 Gabrielsson S, Lötvall J, Valadi H. 2011. Human saliva, plasma and breast milk exosomes  
809 contain RNA: uptake by macrophages. *J Transl Med* **9**:9. doi:10.1186/1479-5876-9-9
- 810 Li W, Pozzo-Miller L. 2014. BDNF deregulation in Rett syndrome. *Neuropharmacology*.  
811 doi:10.1016/j.neuropharm.2013.03.024
- 812 Lillycrop K, Slater-Jefferies J, Hanson M, Godfrey K, Jackson A, Burdge G. 2007. Induction of  
813 altered epigenetic regulation of the hepatic glucocorticoid receptor in the offspring of rats

814 fed a protein-restricted diet during pregnancy suggests that reduced DNA  
815 methyltransferase-1 expression is involved in impaired DNA methylation and. *Br J Nutr*  
816 **97**:1064–1073. doi:10.1017/S000711450769196X

817 Lister R, Mukamel E a, Nery JR, Urich M, Puddifoot C a, Johnson ND, Lucero J, Huang Y,  
818 Dwork AJ, Schultz MD, Yu M, Tonti-Filippini J, Heyn H, Hu S, Wu JC, Rao A, Esteller M,  
819 He C, Haghghi FG, Sejnowski TJ, Behrens MM, Ecker JR. 2013. Global epigenomic  
820 reconfiguration during mammalian brain development. *Science (80- )* **341**:1237905.  
821 doi:10.1126/science.1237905

822 Liyanage VRB, Olson CO, Zachariah RM, Davie JR, Rastegar M. 2019. DNA methylation  
823 contributes to the differential expression levels of *Mecp2* in male mice neurons and  
824 astrocytes. *Int J Mol Sci*. doi:10.3390/ijms20081845

825 Long X, He Y, Huang C, Li J. 2014. MicroRNA-148a is silenced by hypermethylation and  
826 interacts with DNA methyltransferase 1 in hepatocellular carcinogenesis. *Int J Oncol*  
827 **44**:1915–1922. doi:10.3892/ijo.2014.2373

828 Manca S, Upadhyaya B, Mutai E, Desaulniers A, Cederberg R, White B, Zempleni J. 2018. Milk  
829 exosomes are bioavailable and distinct microRNA cargos have unique tissue distribution  
830 patterns. *Sci Rep* **8**:1–11. doi:10.1038/s41598-018-29780-1

831 Marco A, Kisliouk T, Tabachnik T, Meiri N, Weller A. 2014. Overweight and CpG methylation  
832 of the *Pomc* promoter in offspring of high-fat-diet-fed dams are not “reprogrammed” by  
833 regular chow diet in rats. *FASEB J* **28**:4148–4157. doi:10.1096/fj.14-255620

834 McGowan H, Pang ZP. 2015. Regulatory functions and pathological relevance of the *MECP2*  
835 3’UTR in the central nervous system. *Cell Regen*. doi:10.1186/s13619-015-0023-x

836 Merico D, Isserlin R, Stueker O, Emili A, Bader G. 2010. Enrichment map: A network-based

- 837 method for gene-set enrichment visualization and interpretation. *PLoS One* **5**:e13984.  
838 doi:10.1371/journal.pone.0013984
- 839 Minami K, Uehara T, Morikawa Y, Omura K, Kanki M, Horinouchi A, Ono A, Yamada H,  
840 Ohno Y, Urushidani T. 2014. miRNA expression atlas in male rat. *Sci Data* 140005.  
841 doi:10.1038/sdata.2014.5
- 842 Modepalli V, Kumar A, Hinds LA, Sharp JA, Nicholas KR, Lefevre C. 2014. Differential  
843 temporal expression of milk miRNA during the lactation cycle of the marsupial tammar  
844 wallaby (*Macropus eugenii*). *BMC Genomics* **15**:1012. doi:10.1186/1471-2164-15-1012
- 845 Numata S, Ye T, Hyde TM, Guitart-Navarro X, Tao R, Winger M, Colantuoni C, Weinberger  
846 DR, Kleinman JE, Lipska BK. 2012. DNA methylation signatures in development and  
847 aging of the human prefrontal cortex. *Am J Hum Genet* **90**:260–272.  
848 doi:10.1016/j.ajhg.2011.12.020
- 849 Olson CO, Zachariah RM, Ezeonwuka CD, Liyanage VRB, Rastegar M. 2014. Brain region-  
850 specific expression of MeCP2 isoforms correlates with DNA methylation within Mecp2  
851 regulatory elements. *PLoS One*. doi:10.1371/journal.pone.0090645
- 852 Pan W, Zhu S, Yuan M, Cui H, Wang L, Luo X, Li J, Zhou H, Tang Y, Shen N. 2010.  
853 MicroRNA-21 and microRNA-148a contribute to DNA hypomethylation in Lupus CD4+ T  
854 cells by directly and indirectly targeting DNA methyltransferase 1. *J Immunol* **184**:6773–  
855 6781. doi:10.4049/jimmunol.0904060
- 856 Paxinos G, Törk IT, Tecott LH, Valentino KL, Fritchle ALR. 1991. Atlas Of The Developing  
857 Rat Brain, 1st ed. Academic Press.
- 858 Paxinos G, Watson C. 2007. The Rat Brain in Stereotaxic Coordinates Sixth Edition. *Elsevier*  
859 *Acad Press*.

- 860 Peleg-Raibstein D, Luca E, Wolfrum C. 2012. Maternal high-fat diet in mice programs  
861 emotional behavior in adulthood. *Behav Brain Res* **233**:398–404.  
862 doi:10.1016/j.bbr.2012.05.027
- 863 Reimand J, Arak T, Adler P, Kolberg L, Reisberg S, Peterson H, Vilo J. 2016. g:Profiler—a web  
864 server for functional interpretation of gene lists (2016 update). *Nucleic Acids Res* **44**:W83–  
865 W89. doi:10.1093/nar/gkw199
- 866 Rincel M, Lépinay AL, Delage P, Fioramonti J, Théodorou VS, Layé S, Darnaudéry M. 2016.  
867 Maternal high-fat diet prevents developmental programming by early-life stress. *Transl*  
868 *Psychiatry* **6**:e966. doi:10.1038/tp.2016.235
- 869 Rodrigues DC, Kim DS, Yang G, Zaslavsky K, Ha KCH, Mok RSF, Ross PJ, Zhao M, Piekna A,  
870 Wei W, Blencowe BJ, Morris Q, Ellis J. 2016. MECP2 Is Post-transcriptionally Regulated  
871 during Human Neurodevelopment by Combinatorial Action of RNA-Binding Proteins and  
872 miRNAs. *Cell Rep*. doi:10.1016/j.celrep.2016.09.049
- 873 Samaco RC, Nagarajan RP, Braunschweig D, LaSalle JM. 2004. Multiple pathways regulate  
874 MeCP2 expression in normal brain development and exhibit defects in autism-spectrum  
875 disorders. *Hum Mol Genet*. doi:10.1093/hmg/ddh063
- 876 Sasaki A, de Vega W, Sivanathan S, St-Cyr S, McGowan P. 2014. Maternal high-fat diet alters  
877 anxiety behavior and glucocorticoid signaling in adolescent offspring. *Neuroscience*  
878 **272**:92–101. doi:10.1016/j.neuroscience.2014.04.012
- 879 Sasaki A, de Vega W, St-Cyr S, Pan P, McGowan P. 2013. Perinatal high fat diet alters  
880 glucocorticoid signaling and anxiety behavior in adulthood. *Neuroscience* **240**:1–12.  
881 doi:10.1016/j.neuroscience.2013.02.044
- 882 Schellong K, Melchior K, Ziska T, Ott R, Henrich W, Rancourt RC, Plagemann A. 2019.

- 883 Hypothalamic insulin receptor expression and DNA promoter methylation are sex-  
884 specifically altered in adult offspring of high-fat diet (HFD)-overfed mother rats. *J Nutr*  
885 *Biochem* **67**:28–35. doi:10.1016/j.jnutbio.2019.01.014
- 886 Smith A, Calley J, Mathur S, Qian H, Wu H, Farmen M, Caiment F, Bushel P, Li J, Fisher C,  
887 Kirby P, Koenig E, Hall D, Watson D. 2016. The Rat microRNA body atlas; Evaluation of  
888 the microRNA content of rat organs through deep sequencing and characterization of  
889 pancreas enriched miRNAs as biomarkers of pancreatic toxicity in the rat and dog. *BMC*  
890 *Genomics* **17**:694. doi:10.1186/s12864-016-2956-z
- 891 Song Q, Decato B, Hong E, Zhou M, Fang F, Qu J, Garvin T, Kessler M, Zhou J, Smith A. 2013.  
892 A reference methylome database and analysis pipeline to facilitate integrative and  
893 comparative epigenomics. *PLoS One* **8**:e81148. doi:10.1371/journal.pone.0081148
- 894 Suter M, Sangi-Haghpeykar H, Showalter L, Shope C, Hu M, Brown K, Williams S, Harris R,  
895 Grove K, Lane R, Aagaard K. 2012. Maternal high-fat diet modulates the fetal thyroid axis  
896 and thyroid gene expression in a non-human primate model. *Mol Endocrinol* **26**:2071–2080.  
897 doi:10.1210/me.2012-1214
- 898 Tabachnik T, Kisliouk T, Marco A, Meiri N, Weller A. 2017. Thyroid hormone-dependent  
899 epigenetic regulation of melanocortin 4 receptor levels in female offspring of obese rats.  
900 *Endocrinology* **158**:842–851. doi:10.1210/en.2016-1854
- 901 Tozuka Y, Wada E, Wada K. 2009. Diet-induced obesity in female mice leads to peroxidized  
902 lipid accumulations and impairment of hippocampal neurogenesis during the early life of  
903 their offspring. *FASEB J* **23**:1920–1934. doi:10.1096/fj.08-124784
- 904 Van Herwijnen M, Driedonks T, Snoek B, Kroon A, Kleinjan M, Jorritsma R, Pieterse C, Hoen  
905 E, Wauben M. 2018. Abundantly present miRNAs in milk-derived extracellular Vesicles

- 906 are conserved between mammal. *Front Nutr* **5**:81. doi:10.3389/fnut.2018.00081
- 907 Vucetic Z, Kimmel J, Reyes TM. 2011. Chronic high-fat diet drives postnatal epigenetic  
908 regulation of-opioid receptor in the brain. *Neuropsychopharmacology* **36**:1199–1206.  
909 doi:10.1038/npp.2011.4
- 910 Vucetic Z, Kimmel J, Totoki K, Hollenbeck E, Reyes T. 2010. Maternal high-fat diet alters  
911 methylation and gene expression of dopamine and opioid-related genes. *Endocrinology*  
912 **151**:4756–4764. doi:10.1210/en.2010-0505
- 913 Wang J, Bian Y, Wang Z, Li D, Wang C, Li Q, Gao X. 2014. MicroRNA-152 regulates DNA  
914 methyltransferase 1 and is involved in the development and lactation of mammary glands in  
915 dairy cows. *PLoS One* **9**:e101358. doi:10.1371/journal.pone.0101358
- 916 Weisenberger D, Campan M, Long T, Kim M, Woods C, Fiala E, Ehrlich M, Laird P. 2005.  
917 Analysis of repetitive element DNA methylation by MethyLight. *Nucleic Acids Res*  
918 **33**:6823–6836. doi:10.1093/nar/gki987
- 919 Xu Q, Jiang Y, Yin Y, Li Q, He J, Jing Y, Qi Y, Xu Q, Li W, Lu B, Peiper S, Jiang B, Liu L.  
920 2013. A regulatory circuit of miR-148a/152 and DNMT1 in modulating cell transformation  
921 and tumor angiogenesis through IGF-IR and IRS1. *J Mol Cell Biol* **5**:3–13.  
922 doi:10.1093/jmcb/mjs049
- 923 Zempleni J, Sukreet S, Zhou F, Wu D, Mutai E. 2019. Milk-Derived Exosomes and Metabolic  
924 Regulation. *Annu Rev Anim Biosci* **7**:245–262. doi:10.1146/annurev-animal-020518-115300
- 925 Zhang J, Ying Z, Tang Z, Long L, Li K. 2012. MicroRNA-148a promotes myogenic  
926 differentiation by targeting the ROCK1 gene. *J Biol Chem* **287**:21093–21101.  
927 doi:10.1074/jbc.M111.330381
- 928 Zhou Q, Li M, Wang X, Li Q, Wang T, Zhu Q, Zhou X, Wang X, Gao X, Li X. 2012. Immune-

929 related microRNAs are abundant in breast milk exosomes. *Int J Biol Sci* **8**:118–23.

930 doi:10.7150/ijbs.8.118

931
